# Supplementary material for: Facile one-pot synthesis of novel N-benzimidazolyl-α-arylnitrones catalyzed by salts of transition metals
Source: Royal Society of Chemistry journal article supplement (doi:10.1039/c9ra08570j), 2019-01-01
Supplement: c9ra08570j1.pdf [file c9ra08570j1.pdf]

## One-pot and facile synthesis of novel *N*-benzimidazolyl-*a*-arylnitrones catalyzed by salts of transition metals

Mehdi Kalhor\*<sup>a</sup>, Sima Samiei<sup>a</sup>, Seyed Ahmad Mirshokraei<sup>a</sup>

<sup>a</sup> Department of Chemistry, University of Payame Noor, P.O. BOX 19395-4697, Tehran-IRAN

\*E-mail: [mekalhor@gmail.com](mailto:mekalhor@gmail.com), [mekalhor@pnu.ac.ir](mailto:mekalhor@pnu.ac.ir)

### Supporting Information

|                                                                              |    |
|------------------------------------------------------------------------------|----|
| 1. Spectral Data of the Compounds .....                                      | 2  |
| 2. <sup>1</sup> H, <sup>13</sup> C NMR and Mass Spectra of <b>3a-j</b> ..... | 5  |
| 3. Computational data of compound <b>3a</b> .....                            | 21 |

## Experimental

All the consumed chemicals were purchased from companies Merck or Fluka. By using an Electro-thermal digital apparatus, melting points were determined and are uncorrected. A Galaxy Series FT-IR 5000 spectrometer (using KBr discs) was used for recording of IR spectra.  $^1\text{H}$ - and  $^{13}\text{C}$  NMR spectra were performed in DMSO- $d_6$  on a Bruker (300 and 500 MHz) spectrometer. Chemical shifts ( $\delta$ ) were presented in ppm using tetramethyl silane (TMS) as internal standard. The Mass spectra were recorded on an Agilent model: 5975C VL MSD with Tripe-Axis Detector spectrometer at 70 eV. Reactions were monitored by thin layer chromatography (TLC) using silica gel F<sub>254</sub> aluminum sheets (Merck).

### General preparation of nitrones **3a-j**

To a solution of 2-aminobenzimidazole (1 mmol) and corresponding aromatic aldehyde (1 mmol) in ethanol (5 mL), the  $\text{Mn}(\text{NO}_3)_2 \cdot 6\text{H}_2\text{O}$  (10 mol%, 0.027 gr) was added. The reaction mixture was stirred using a magnetically at room temperature. Then, *m*-CPBA (1.2 mmol) is added to it. The reaction progress was pursued by TLC (petroleum ether: ethyl acetate 2:1). After completing of the reaction, to the mixture was added aqueous  $\text{NaHCO}_3$  (10%, 15 mL) and the resulting precipitate was filtrated to give pure nitrones **3a-j**. For further purity, these products can be crystallized by the mixture of ether: *n*-hexane (1:1). Also, the increase of HCl (10%) to the filtrate causes the *m*-chlorobenzoic acid to precipitate which by filtrating, the acid extraneous product is separated off.

### Spectroscopic data for nitrones **3a-j**

***N*-(1*H*-benzo[*d*]imidazol-2-yl)-*a*-phenyl nitrone (3a)**. Light yellow solid. IR (KBr,  $\nu_{\text{max}}$ ): 3269 (N-H), 3095 (C-H), 1683, 1608 (C=N), 1535 (-C=N-O), 1419, 1222 (C=C), 1382 (H-C=N), 1263 (C-N), 1029 (N-O), 898, 759 (C-H), 619  $\text{cm}^{-1}$ ;  $^1\text{H}$  NMR (300 MHz, DMSO- $d_6$ ):  $\delta_{\text{H}}$  11.07 (br, 1H, NH, The NH protons disappeared upon  $\text{D}_2\text{O}$  addition), 8.68 (s br, 1H, H-C=N<sup>+</sup>-O<sup>-</sup>), 7.98 (s br, 2H, H-Ar), 7.49-7.08 (t br, 6H, H-Ar) ppm,  $^{13}\text{C}$  NMR (DMSO- $d_6$ , 75 MHz):  $\delta_{\text{C}}$  170.1, 153.6, 139.2, 133.2, 132.4, 130.8, 130.2, 129.3, 128.1, 122.2, 111.5 ppm; MS (*m/z*, %): 237.2 ( $\text{M}^+$ , 5), 156.0 (75), 133.1 (100), 111.1 (58), 85.2 (40), 71.2 (46), 57.2 (62), 43.2 (43).

***N*-(1*H*-benzo[*d*]imidazol-2-yl)-*a*-(2-chlorophenyl) nitrone (3b)**. Gray solid. IR (KBr,  $\nu_{\text{max}}$ ): 3377 (N-H), 1666, 1631 (C=N), 1579 (-C=N-O), 1519, 1435, 1298, 1273 (C=C), 1456 (H-C=N), 1176 (C-N), 1143, 1020 (N-O), 866 (C-Cl), 744 (C-H)  $\text{cm}^{-1}$ ;  $^1\text{H}$  NMR (DMSO- $d_6$ , 300 MHz):  $\delta_{\text{H}}$  12.27 (br, 1H, NH), 7.68 (d,  $J = 5.91$  Hz, 1H, H-C=N<sup>+</sup>-O<sup>-</sup>), 7.55-7.45 (m, 6H, H-Ar), 7.12 (s br, 2H, H-Ar) ppm,  $^{13}\text{C}$  NMR (DMSO- $d_6$ , 125 MHz):  $\delta_{\text{C}}$  167.2, 147.3, 135.8, 135.2, 131.4, 130.2, 129.7, 129.3, 127.0, 121.4, 119.9, 113.8 ppm, MS (*m/z*, %): 271.1 ( $\text{M}^+$ , 46), 236.1 (52), 208.1 (48), 139.1 (100), 111.1 (71), 75.1 (34).

***N*-(1*H*-benzo[*d*]imidazol-2-yl)-*a*-(3-chlorophenyl) nitrone (3c).** Gray solid. IR (KBr,  $\nu_{\max}$ ): 3307 (N-H), 1624, 1604 (C=N), 1575 (-C=N-O), 1596, 1344 (C=C), 1473 (H-C=N), 1263 (C-N), 1024 (N-O), 918 (C-Cl), 758 (C-H), 740  $\text{cm}^{-1}$ ;  $^1\text{H}$  NMR (DMSO- $d_6$ , 300 MHz):  $\delta_{\text{H}}$  12.22 (br, 1H, NH), 7.68 (d,  $J = 5.49$  Hz, 1H, H-C=N<sup>+</sup>-O<sup>-</sup>), 7.55-7.48 (t br, 6H, H-Ar), 7.14 (s, 2H, H-Ar) ppm,  $^{13}\text{C}$  NMR (DMSO- $d_6$ , 75 MHz):  $\delta_{\text{C}}$  167.2, 147.2, 135.6, 135.0, 131.2, 129.9, 129.5, 129.0, 126.9, 124.0, 121.2, 113.6 ppm, MS (m/z, %): 271.1 (M<sup>+</sup>, 21), 243.1 (18), 160.1 (28), 139.1 (100), 111.1 (71), 75.1 (27).

***N*-(1*H*-benzo[*d*]imidazol-2-yl)-*a*-(4-chlorophenyl) nitrone (3d).** Gray solid. IR (KBr,  $\nu_{\max}$ ): 3348 (N-H), 1653, 1641 (C=N), 1571 (-C=N-O), 1591, 1523, 1435 (C=C), 1462 (H-C=N), 1271 (C-N), 1093 (N-O), 844 (C-Cl), 750 (C-H)  $\text{cm}^{-1}$ ;  $^1\text{H}$  NMR (DMSO- $d_6$ , 500 MHz):  $\delta_{\text{H}}$  12.33 (br, 1H, NH, The NH protons disappeared upon D<sub>2</sub>O addition), 8.15 (s br, 1H, H-C=N<sup>+</sup>-O<sup>-</sup>), 7.89 (s br, 2H, H-Ar), 7.65-7.53 (t br, 4H, H-Ar), 7.15 (s, 2H, H-Ar) ppm;  $^{13}\text{C}$  NMR (DMSO- $d_6$ , 125 MHz):  $\delta_{\text{C}}$  168.8, 150.1, 136.8, 136.4, 134.3, 132.8, 131.0, 130.2, 128.2, 121.8, 119.6, 112.7 ppm, MS (m/z, %): 271.1 (M<sup>+</sup>, 48), 236.2 (51), 208.2 (41), 139.2 (100), 111.2 (45), 75.2 (17).

***N*-(1*H*-benzo[*d*]imidazol-2-yl)-*a*-(4-bromophenyl) nitrone (3e).** Gray solid. IR (KBr,  $\nu_{\max}$ ): 3311 (N-H), 1660, 1624 (C=N), 1550 (-C=N-O), 1571, 1394 (C=C), 1340 (H-C=N), 1273 (C-N), 1012 (N-O), 808 (C-Br), 769 (C-H), 736  $\text{cm}^{-1}$ ;  $^1\text{H}$  NMR (DMSO- $d_6$ , 500 MHz):  $\delta_{\text{H}}$  12.36 (br, 1H, NH), 8.07 (s br, 2H, H-C=N<sup>+</sup>-O<sup>-</sup> and H-Ar), 7.70 (br, 2H, H-Ar), 7.44 (br, 2H, H-Ar), 7.14 (br, 3H, H-Ar) ppm,  $^{13}\text{C}$  NMR (DMSO- $d_6$ , 125 MHz):  $\delta_{\text{C}}$  169.1, 150.2, 134.8, 132.7, 131.1, 130.4, 129.3, 128.3, 127.7, 125.5, 121.8, 119.0, 112.7 ppm, MS (m/z, %): 315.2 (M<sup>+</sup>, 57), 287.1 (53), 185.1 (100), 155.1 (50), 132 (14), 105.2 (28), 76.2 (28).

***N*-(1*H*-benzo[*d*]imidazol-2-yl)-*a*-(3-nitrophenyl) nitrone (3f).** Red solid. IR (KBr,  $\nu_{\max}$ ): 3317 (N-H), 1705, 1618 (C=N), 1581 (-C=N-O), 1531, 1348 (-NO<sub>2</sub>), 1597, 1469, 1419 (C=C), 1400 (H-C=N), 1263 (C-N), 1080 (N-O), 923, 752 (C-H), 731, 715  $\text{cm}^{-1}$ ;  $^1\text{H}$  NMR (300 MHz, DMSO- $d_6$ ):  $\delta_{\text{H}}$  (the NH proton exchange with deuterium of D<sub>2</sub>O, which is present in DMSO- $d_6$ ), 8.96 (s, 1H, H-C=N<sup>+</sup>-O<sup>-</sup>), 8.57-8.50 (m, 1H, H-Ar), 8.36 (d,  $J = 6.66$  Hz, 1H, H-Ar), 7.91-7.74 (m, 2H, H-Ar), 7.34 (d,  $J = 7.50$  Hz, 2H, H-Ar), 7.15 (br, 2H, H-Ar) ppm;  $^{13}\text{C}$  NMR (DMSO- $d_6$ , 75 MHz):  $\delta_{\text{C}}$  170.1, 137.6, 135.3, 135.0, 131.9, 131.4, 130.1, 128.9, 125.7, 124.4, 123.4, 122.4, 112.5 ppm, MS (m/z, %): 282.1 (M<sup>+</sup>, 50), 160.1 (50), 132.1 (100), 105.1 (50), 76.1 (37).

***N*-(1*H*-benzo[*d*]imidazol-2-yl)-*a*-(4-nitrophenyl) nitrone (3g).** Red solid. IR (KBr,  $\nu_{\max}$ ): 3346 (N-H), 1670, 1651 (C=N), 1575 (-C=N-O), 1521, 1352 (-NO<sub>2</sub>), 1597, 1309 (C=C), 1462 (H-C=N), 1278 (C-N), 1103 (N-O), 850, 740 (C-H), 715  $\text{cm}^{-1}$ ;  $^1\text{H}$  NMR (DMSO- $d_6$ , 300 MHz):  $\delta_{\text{H}}$  12.56 (br, 1H, NH), 8.34 (d,  $J = 6.99$  Hz, 3H, H-C=N<sup>+</sup>-O<sup>-</sup> and H-Ar), 8.13 (d,  $J = 8.07$  Hz, 2H, H-Ar), 7.44-7.18 (d br, 4H, H-Ar) ppm;  $^{13}\text{C}$  NMR (DMSO- $d_6$ , 75 MHz):  $\delta_{\text{C}}$  170.6, 152.4, 151.0, 149.4, 143.3, 140.4,

131.0, 130.1, 124.6, 123.7, 122.8, 112.5 ppm; MS (m/z, %): 282 (M<sup>+</sup>, 100), 254 (57), 235 (12), 219 (12), 160 (99), 121, 104 (77).

***N*-(1*H*-benzo[*d*]imidazol-2-yl)-*a*-(*p*-tolyl) nitrone (3h).** Gray solid. IR (KBr,  $\nu_{\max}$ ): 3396 (N-H), 2924 (C-H), 1658, 1633 (C=N), 1573 (-C=N-O), 1527, 1456, 1313, 1257 (C=C), 1431 (H-C=N), 1168 (C-N), 1020 (N-O), 842, 767, 750 (C-H), 611 cm<sup>-1</sup>; <sup>1</sup>H NMR (300 MHz, DMSO-*d*<sub>6</sub>):  $\delta_H$  (the NH proton exchange with deuterium of D<sub>2</sub>O, which is present in DMSO-*d*<sub>6</sub>), 8.08 (d, *J* = 7.50 Hz, 2H, H-C=N<sup>+</sup>-O<sup>-</sup> and H-Ar), 7.08-7.42 (m, 7H, H-Ar), 2.36 (s, 3H, CH<sub>3</sub>) ppm; <sup>13</sup>C NMR (DMSO-*d*<sub>6</sub>, 75 MHz):  $\delta_C$  168.8, 151.1, 142.0, 135.7, 133.0, 129.2, 128.8, 121.3, 113.7 ppm, MS (m/z, %): 251.2 (M<sup>+</sup>, 96), 223.2 (56), 119.1 (100), 91.1 (87), 65.1 (25).

***N*-(1*H*-benzo[*d*]imidazol-2-yl)-*a*-(4-methoxyphenyl) nitrone (3i).** Gray solid. IR (KBr,  $\nu_{\max}$ ): 3327 (N-H), 1660, 1624 (C=N), 1556 (-C=N-O), 1602, 1573, 1458, 1519 (C=C), 1346 (H-C=N), 1286 (C-O), 1273 (C-N), 1020 (N-O), 910, 767 (C-H), 731 cm<sup>-1</sup>; <sup>1</sup>H NMR (DMSO-*d*<sub>6</sub>, 500 MHz):  $\delta_H$  12.18 (br, 1H, NH), 8.12 (d, *J* = 6.55 Hz, 1H, H-C=N<sup>+</sup>-O<sup>-</sup>), 7.87 (t, *J* = 8.55 Hz, 1H, H-Ar), 7.66 (d, *J* = 7.75 Hz, 1H, H-Ar), 7.53-7.44 (q br, 2H, H-Ar), 7.12-6.90 (m, 4H, H-Ar), 3.83 (s, 3H, OMe) ppm; <sup>13</sup>C NMR (DMSO-*d*<sub>6</sub>, 125 MHz):  $\delta_C$  166.9, 162.3, 148.5, 134.7, 131.6, 130.2, 125.8, 121.1, 114.4, 113.5, 55.3 ppm; MS (m/z, %): 267.1 (M<sup>+</sup>, 13), 263.1 (14), 220.1 (72), 133.1 (54), 105.1 (27), 77.1 (25), 44 (100).

***N*-(1*H*-benzo[*d*]imidazol-2-yl)-*a*-(2-hydroxyphenyl) nitrone (3j).** Gray solid. IR (KBr,  $\nu_{\max}$ ): 3369 (N-H), 1683, 1635 (C=N), 1560 (-C=N-O) 1580, 1381 (C=C), 1458 (H-C=N), 1290 (C-O), 1273 (C-N), 1047 (N-O), 744 (C-H) cm<sup>-1</sup>; <sup>1</sup>H NMR (DMSO-*d*<sub>6</sub>, 500 MHz):  $\delta_H$  11.95 (br, 1H, NH), 11.04 (br, 1H, OH), 8.11 (s, 1H, H-C=N<sup>+</sup>-O<sup>-</sup>), 7.85 (s, 1H, H-Ar), 7.37-7.28 (d br, 2H, H-Ar), 6.97 (t br, 2H, H-Ar), 6.87-6.78 (m, 5H, H-Ar) ppm; <sup>13</sup>C NMR (DMSO-*d*<sub>6</sub>, 125 MHz):  $\delta_C$  169.5, 154.0, 138.6, 133.68, 133.63, 133.2, 131.0, 130.3, 129.3, 128.1, 121.7, 111.6 ppm; EIMS (m/z, %): 253.1 (M<sup>+</sup>, 22), 225.1 (13), 160.0 (17), 121.1 (100), 93.1 (54), 65.1 (82).

***N*-(1*H*-benzo[*d*]imidazol-2-yl)-*a*-phenyl nitron (3a)**

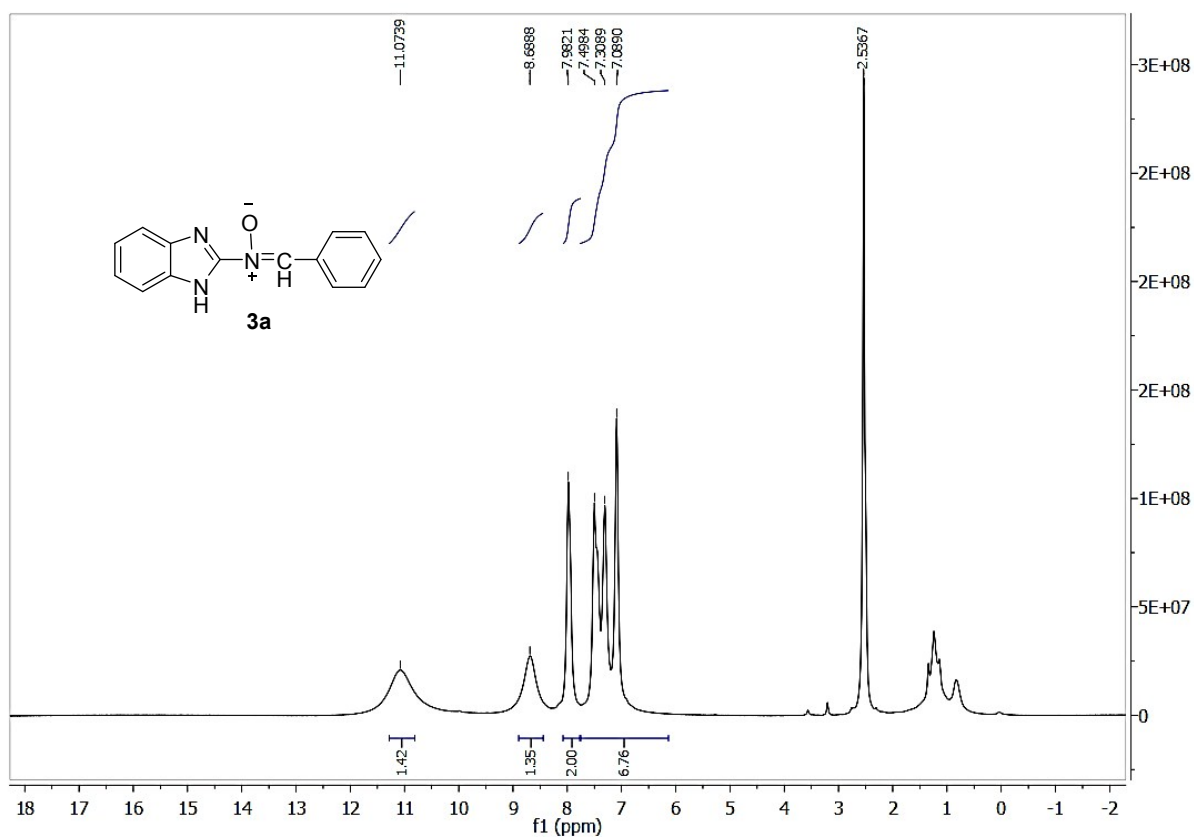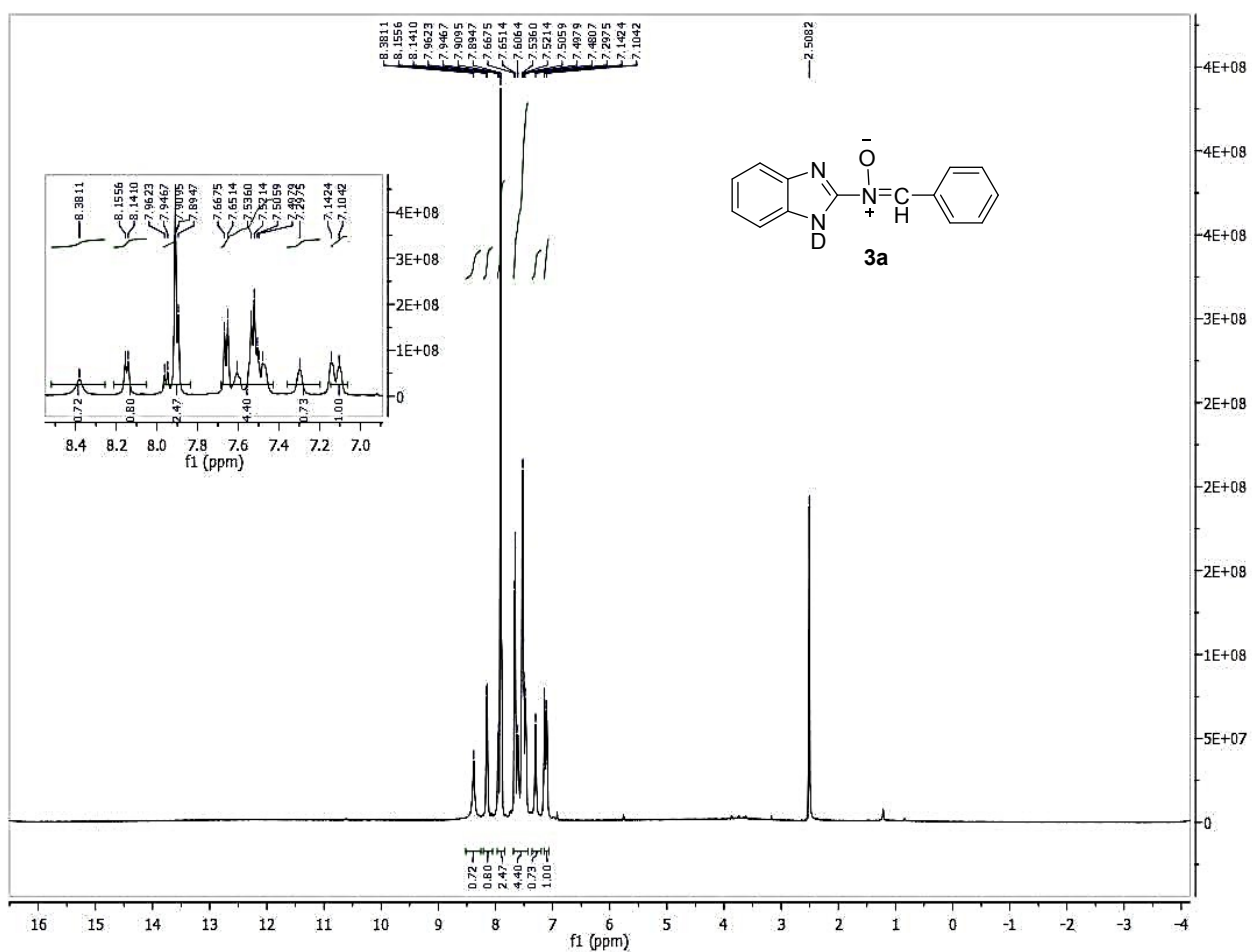

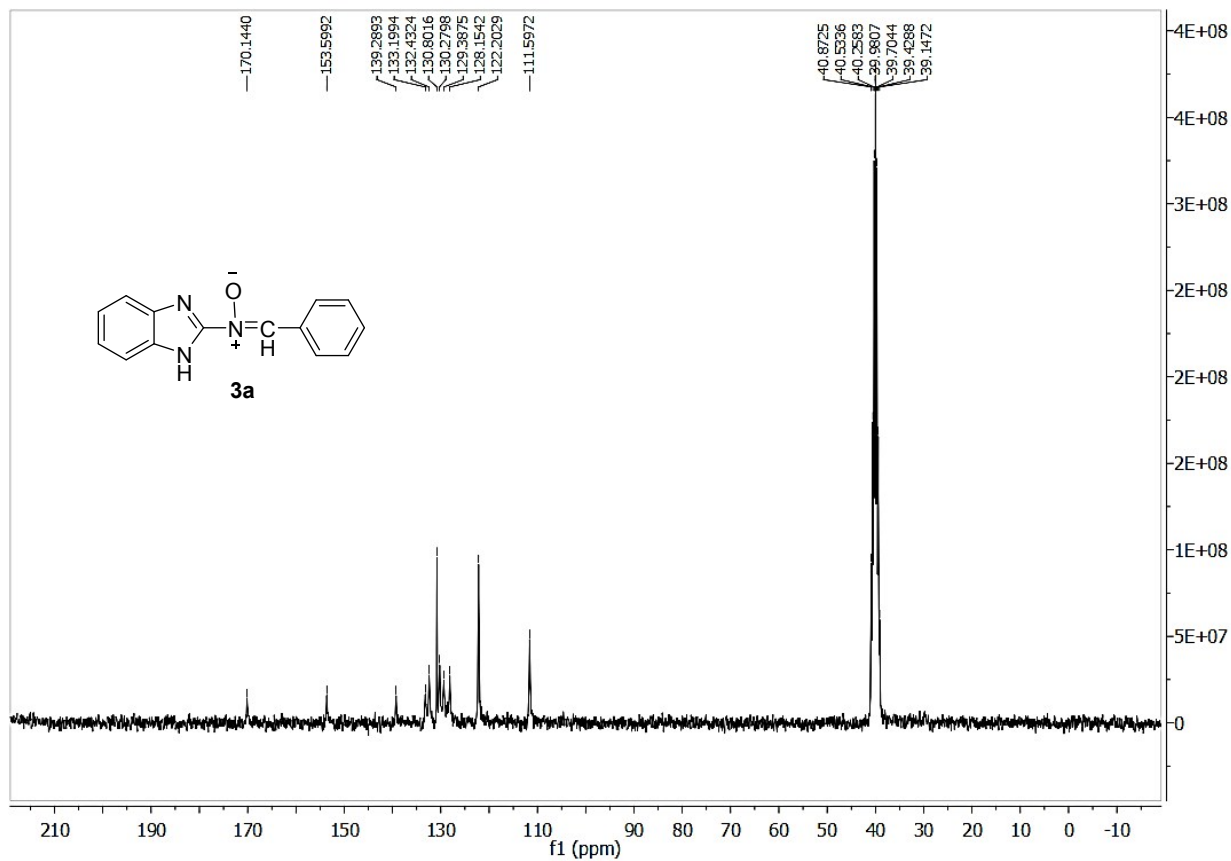

Abundance

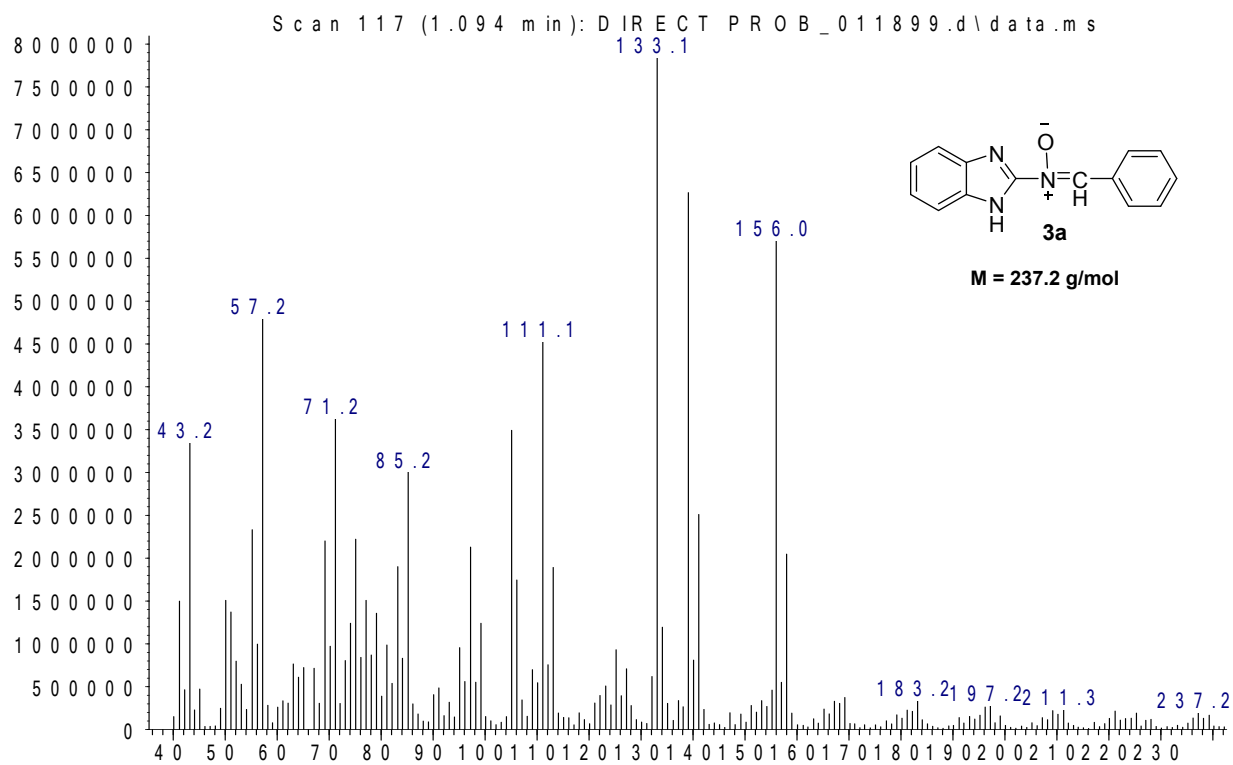

m / z-->

# *N*-(1*H*-benzo[*d*]imidazol-2-yl)-*a*-(2-chlorophenyl) nitron (3b)

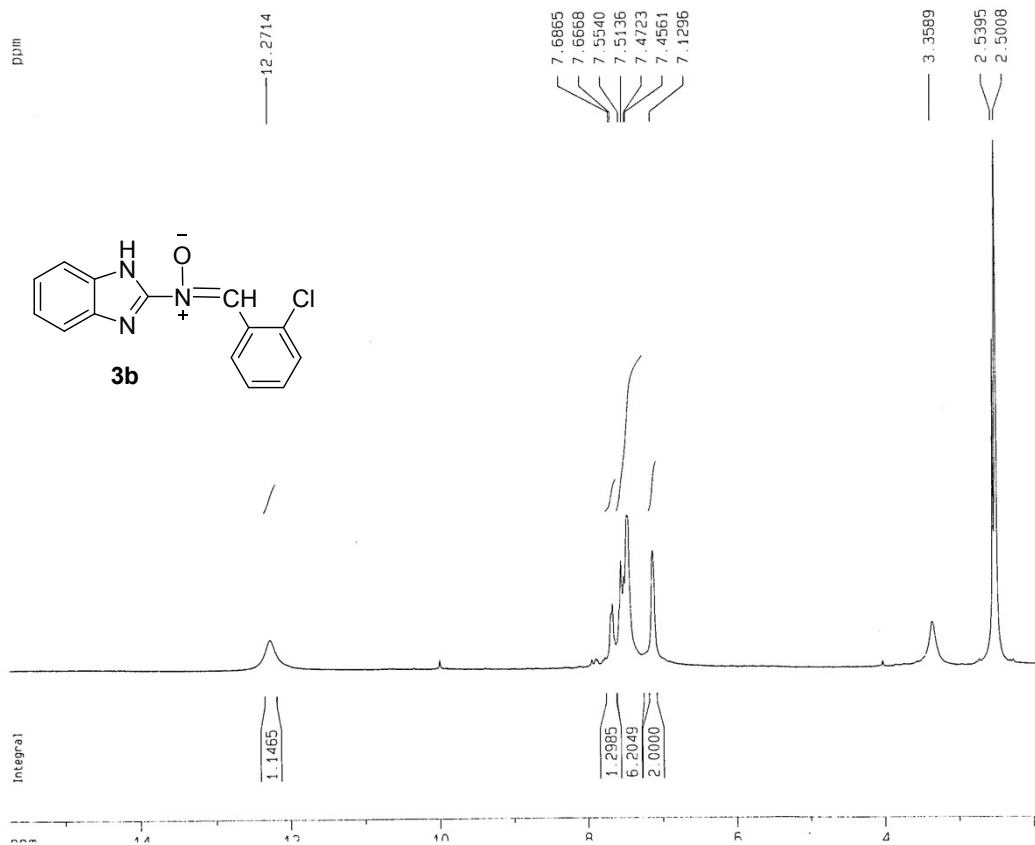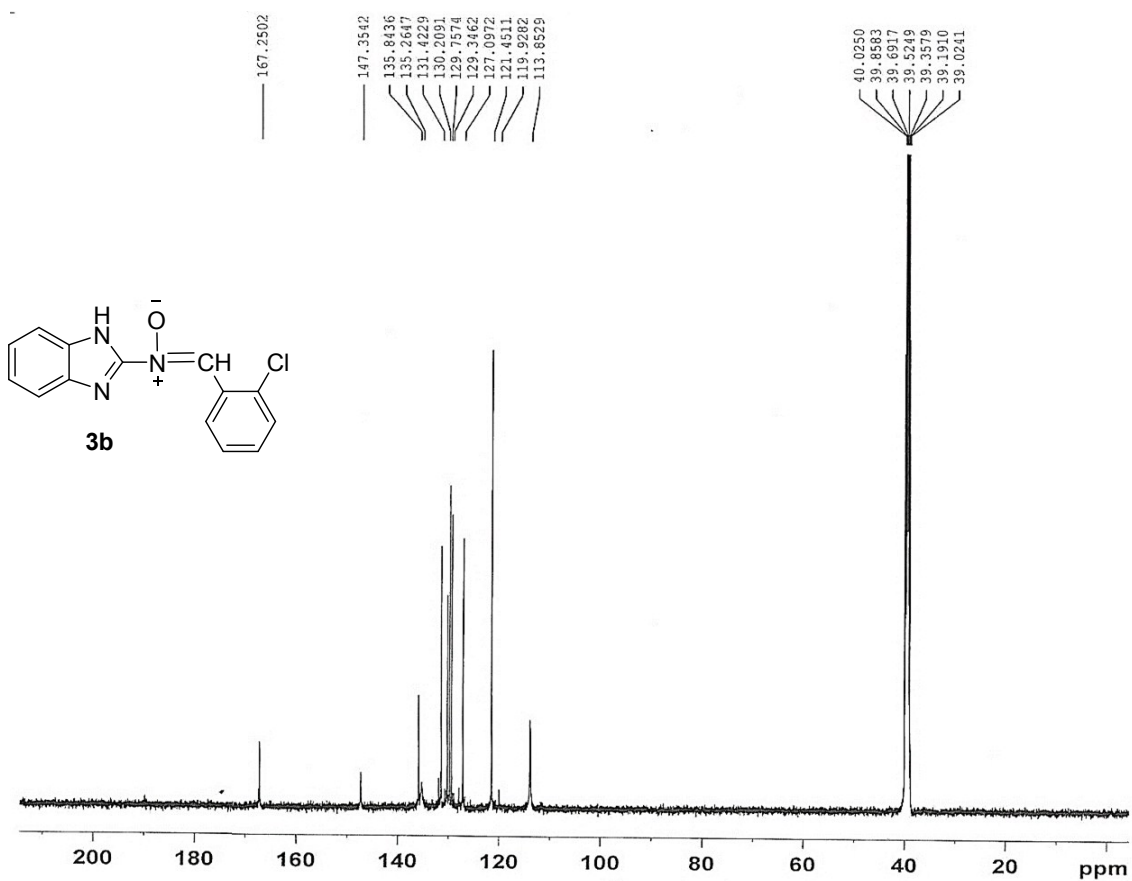

Abundance

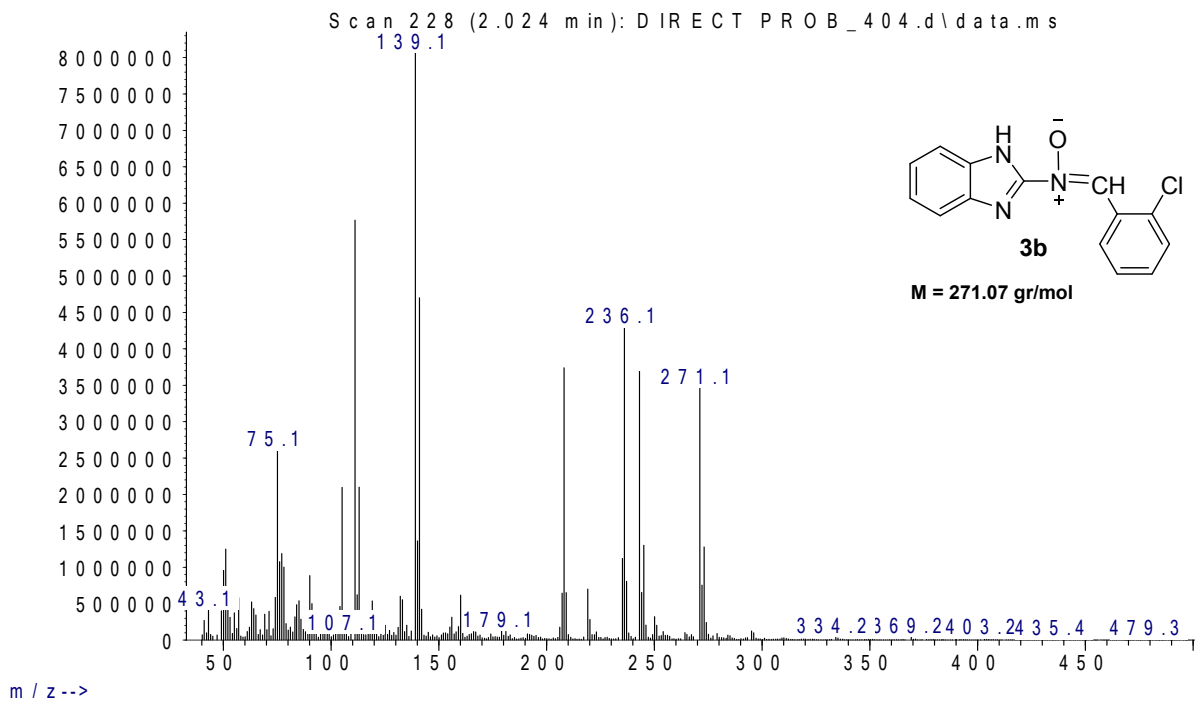

***N*-(1*H*-benzo[*d*]imidazol-2-yl)-*a*-(3-chlorophenyl) nitron (3c)**

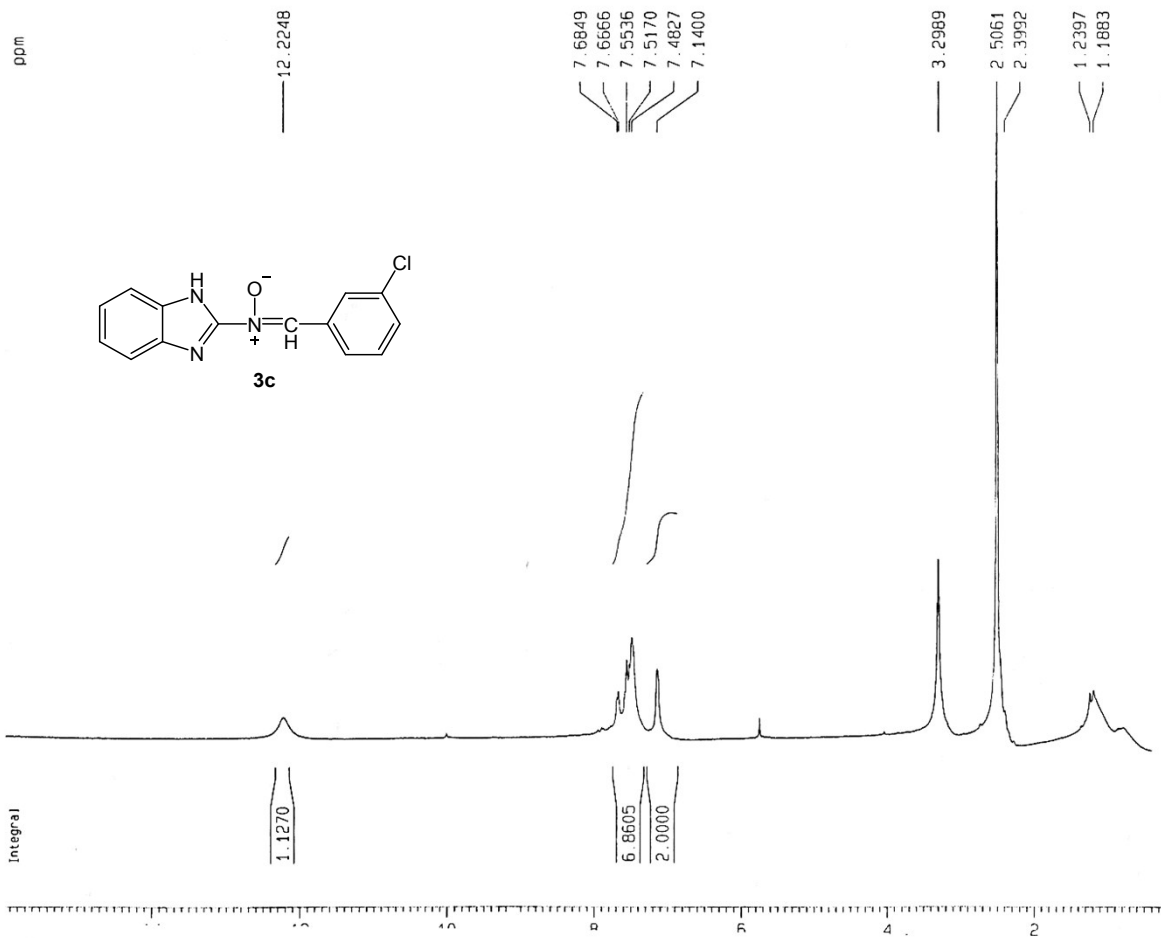



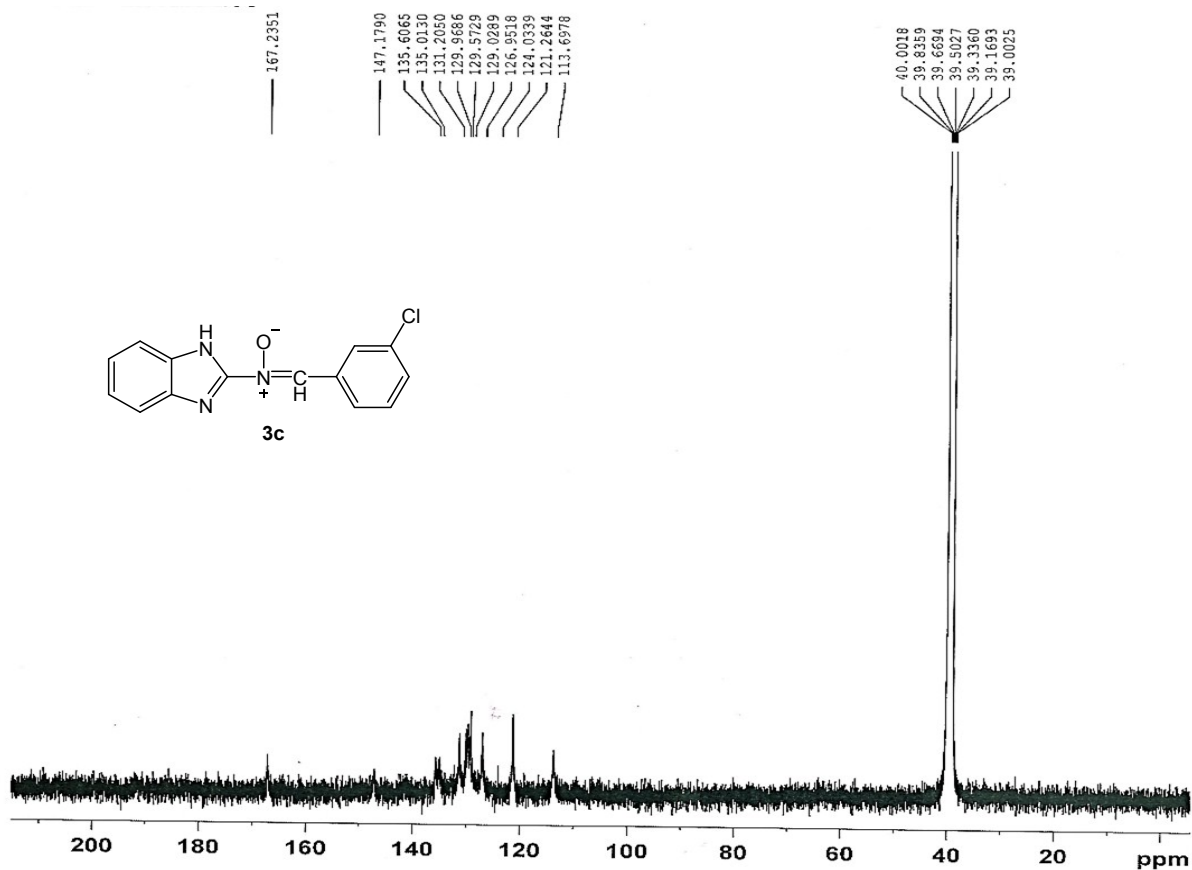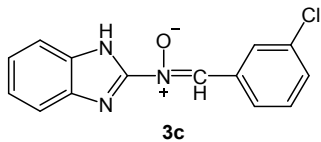

Abundance

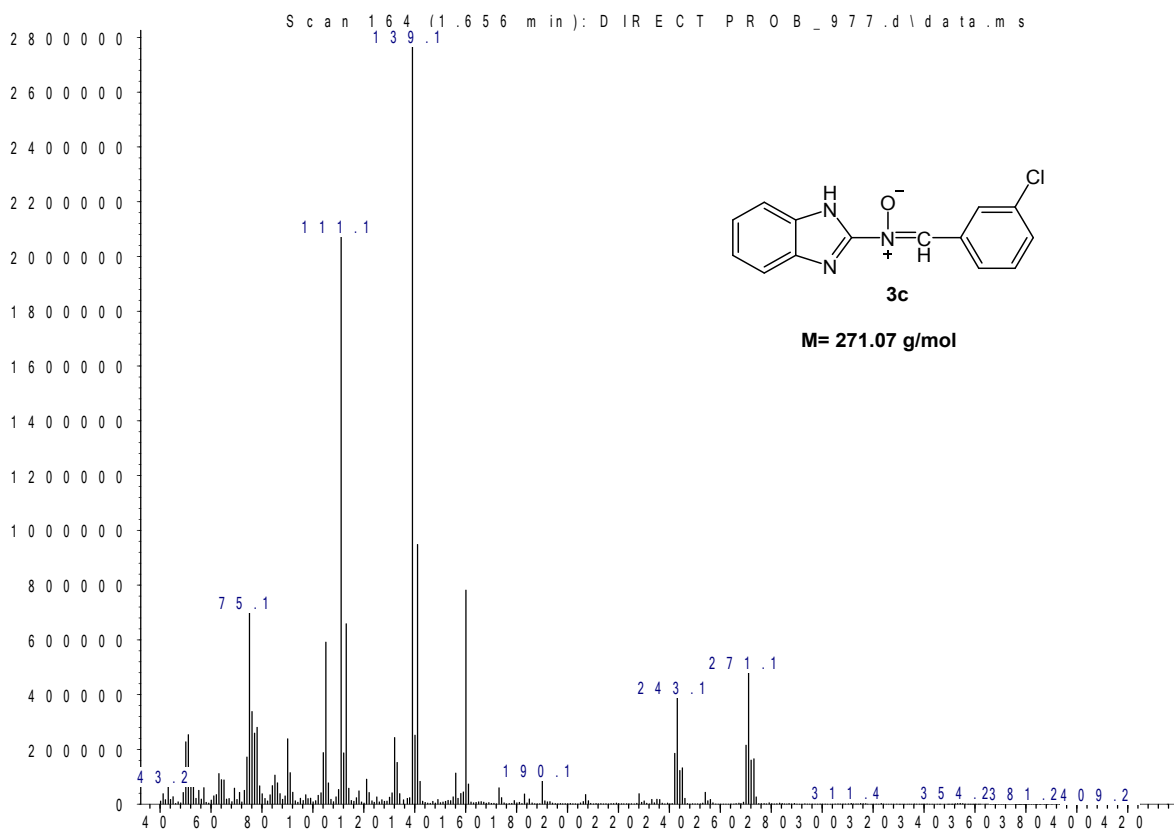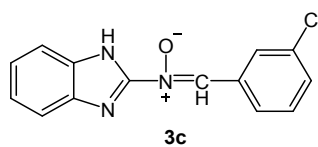

M= 271.07 g/mol

***N*-(1*H*-benzo[*d*]imidazol-2-yl)-*a*-(4-chlorophenyl) nitron (3d)**

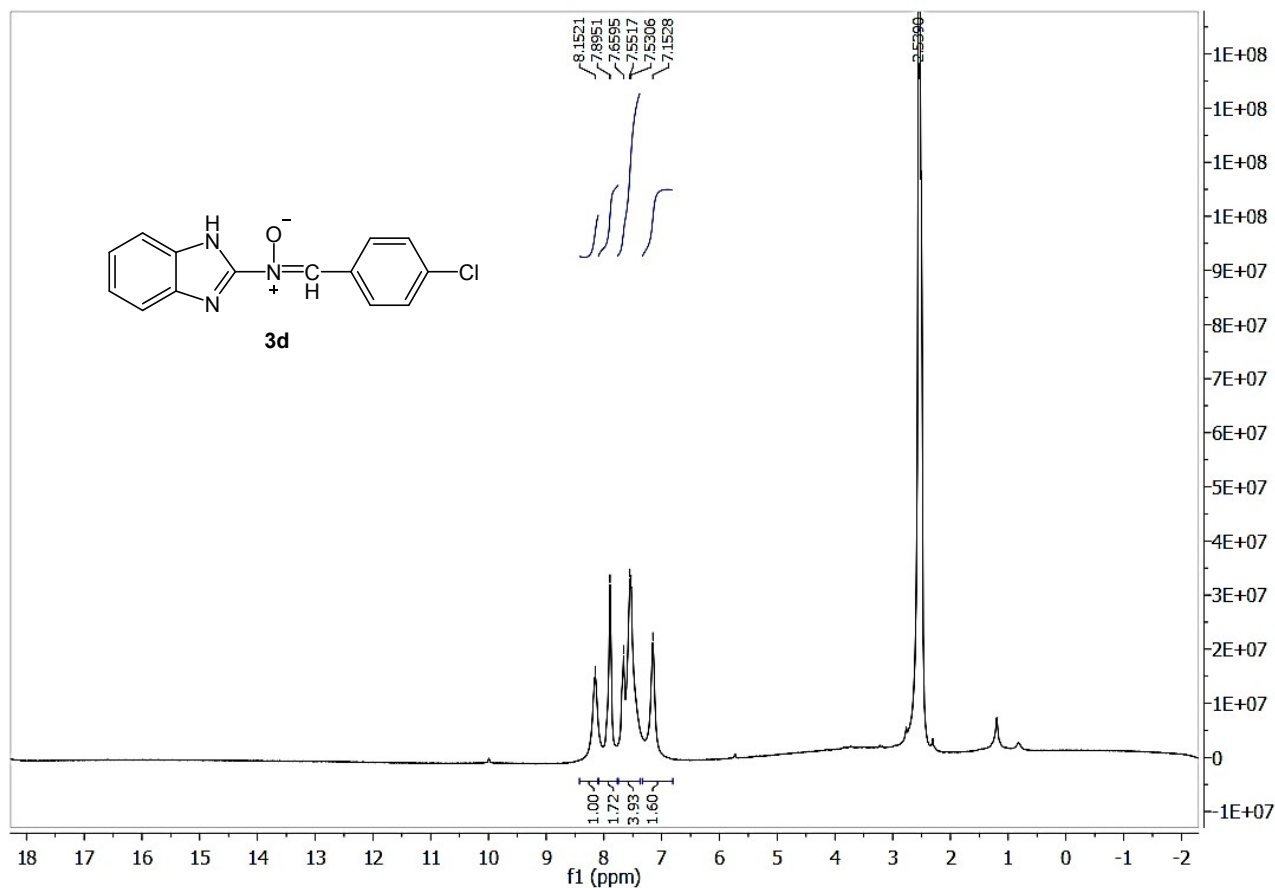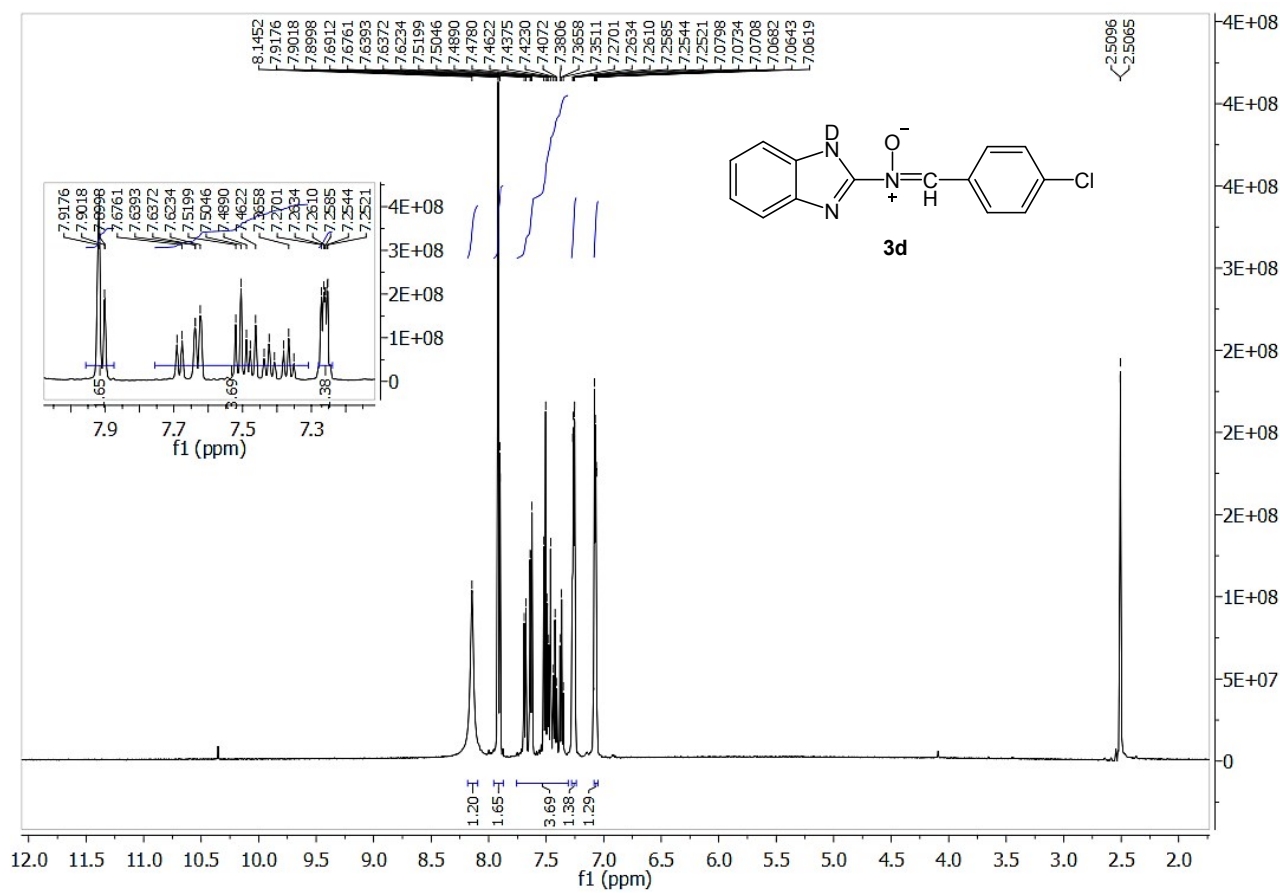

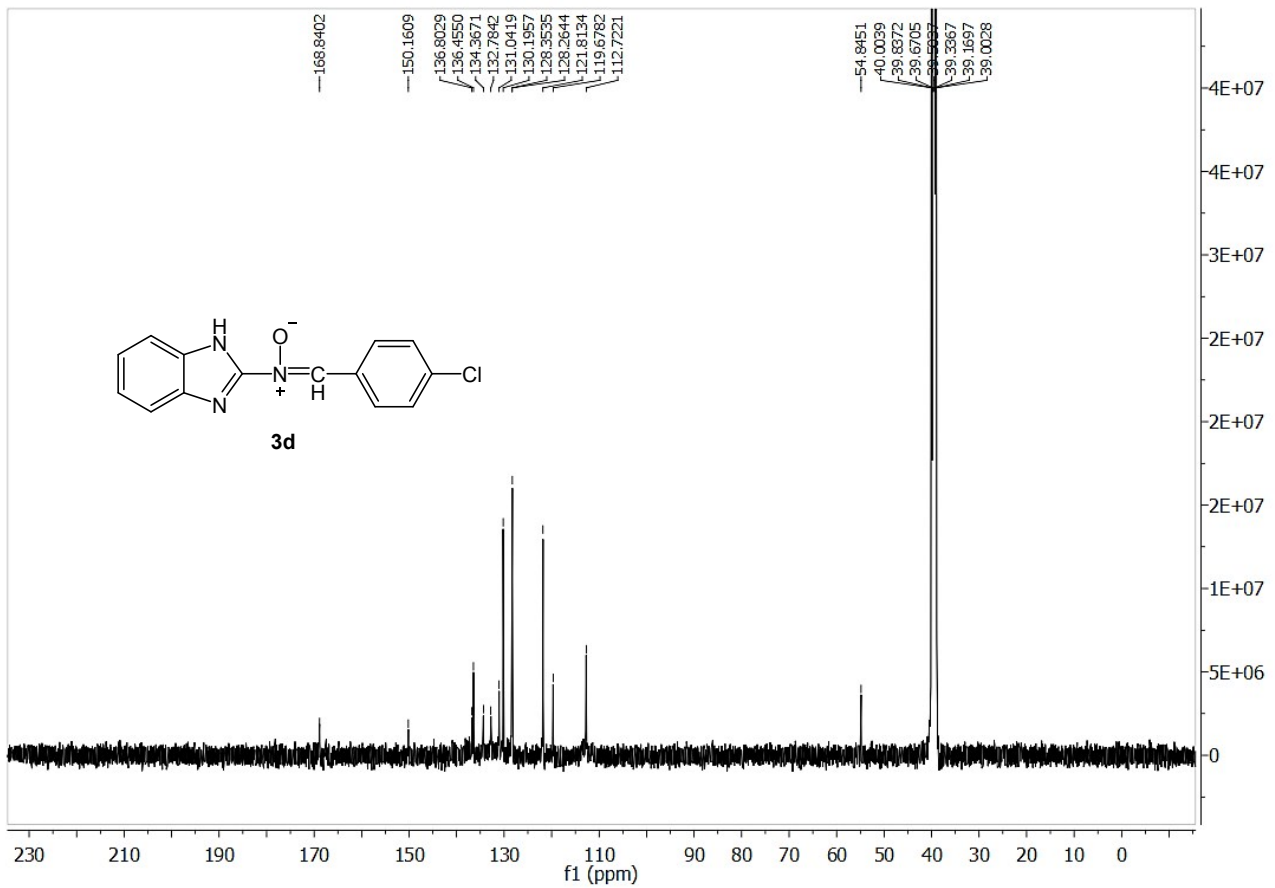

Abundance

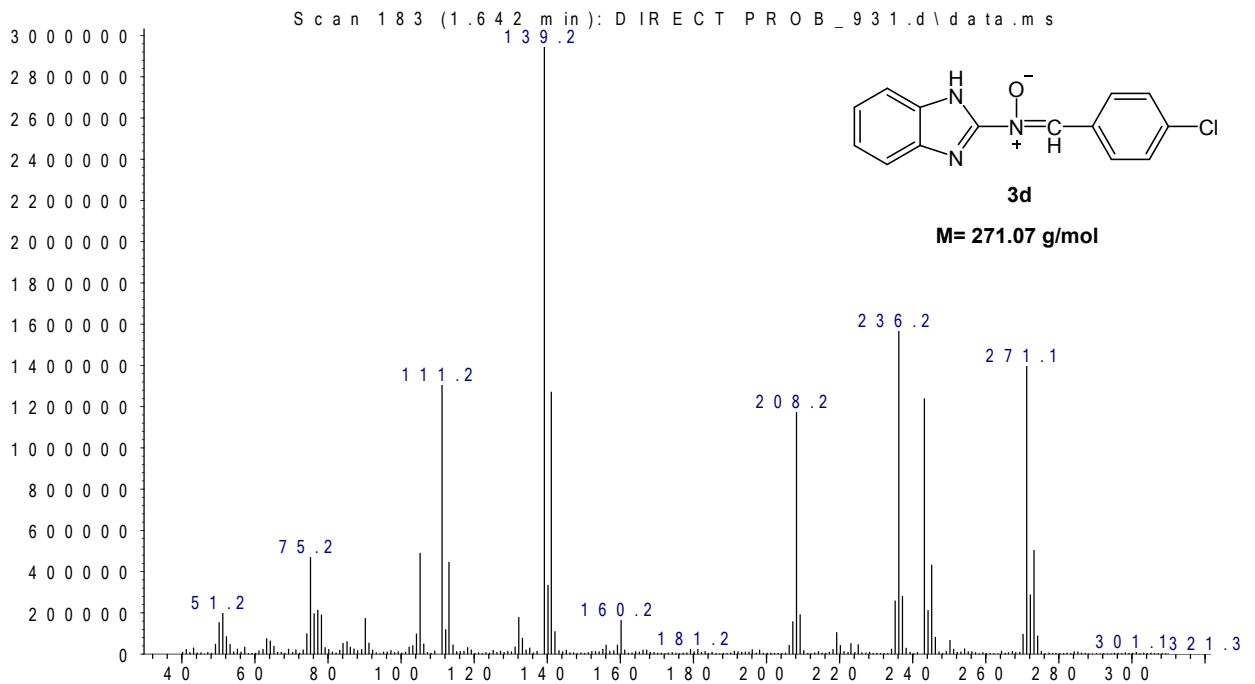

m / z -->

***N*-(1*H*-benzo[*d*]imidazol-2-yl)-*a*-(4-bromophenyl) nitronium ion (**3e**)**

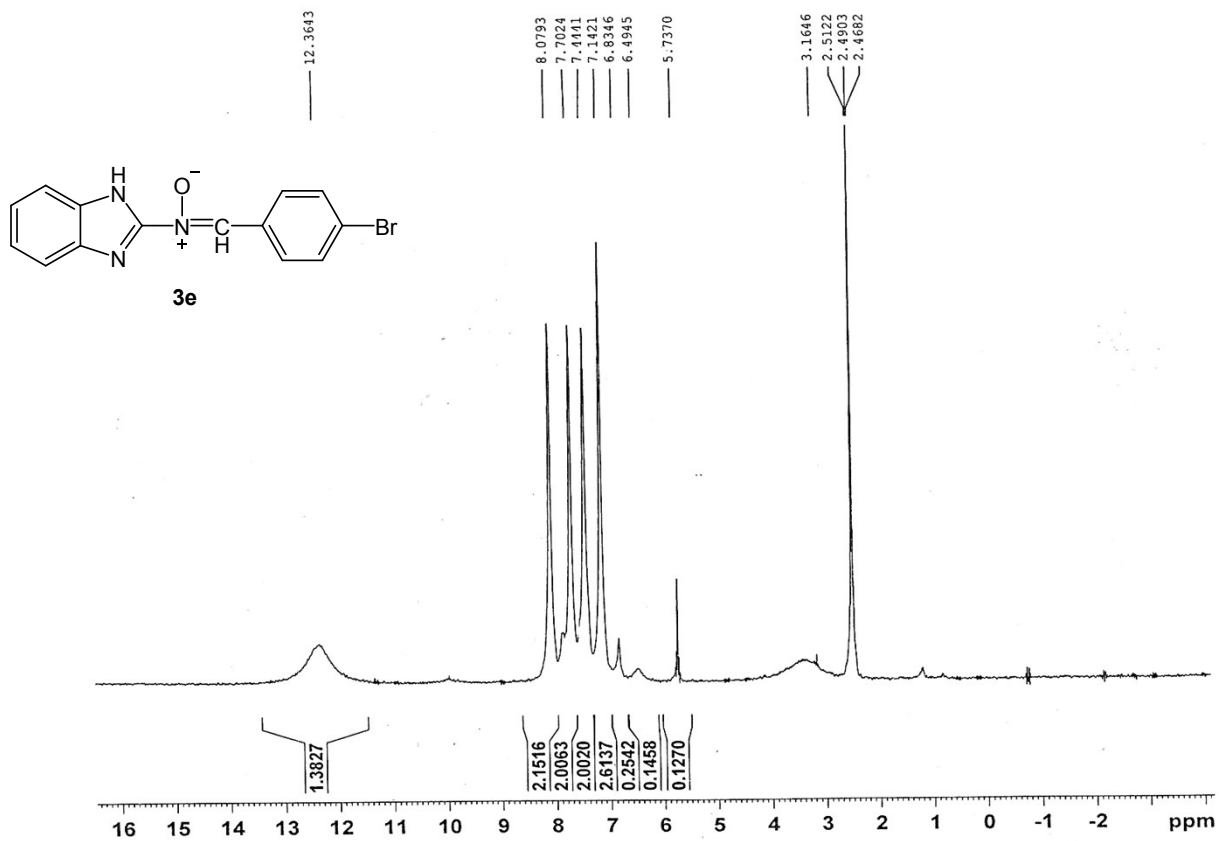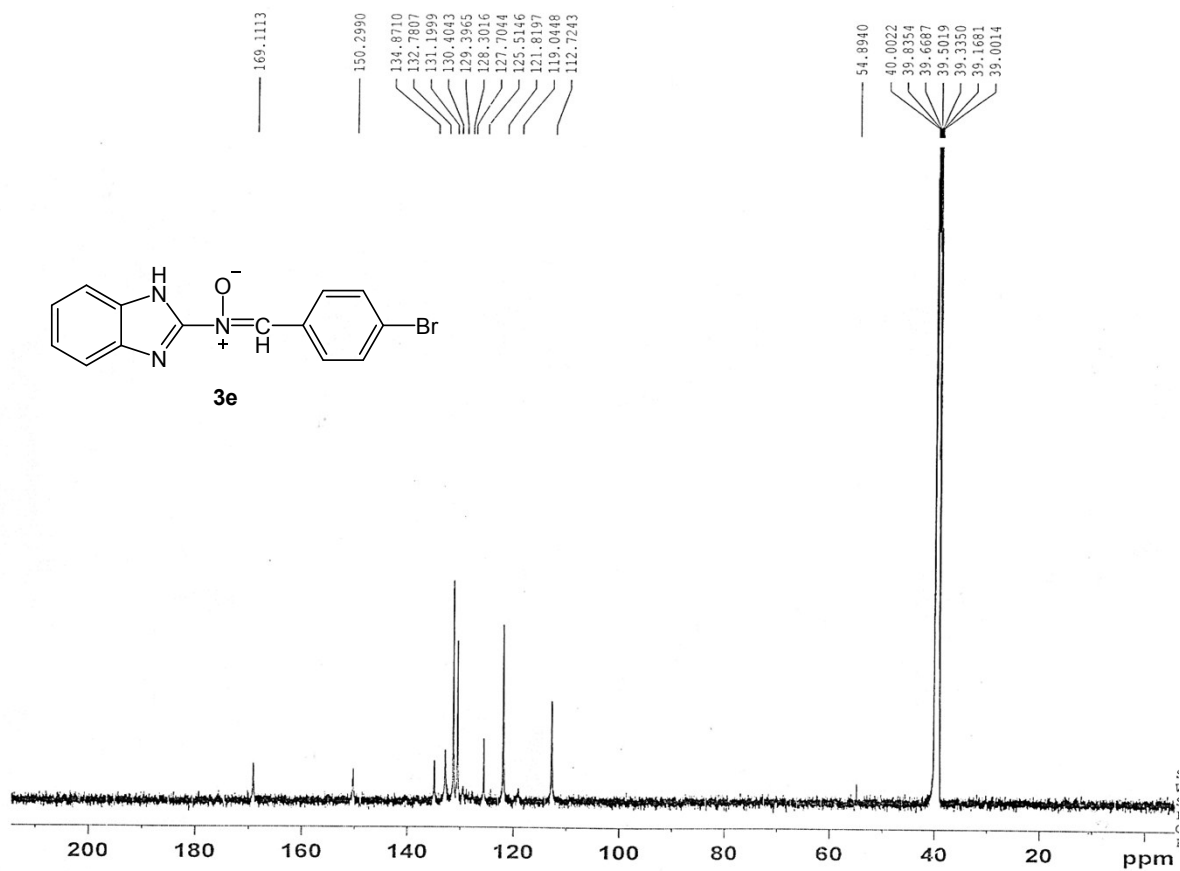

Abundance

Scan 216 (2.153 min): DIRECT PROB\_979.d\data.ms

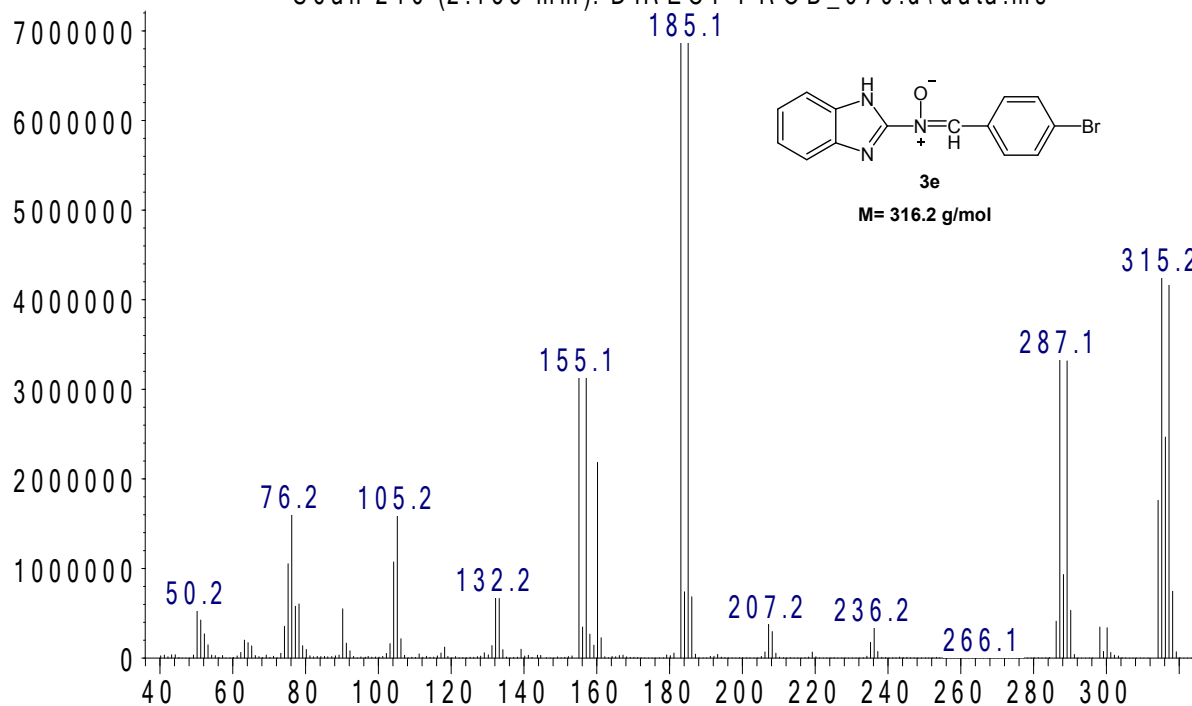

m/z-->

### N-(1H-benzo[d]imidazol-2-yl)-a-(3-nitrophenyl) nitronium ion (3f)

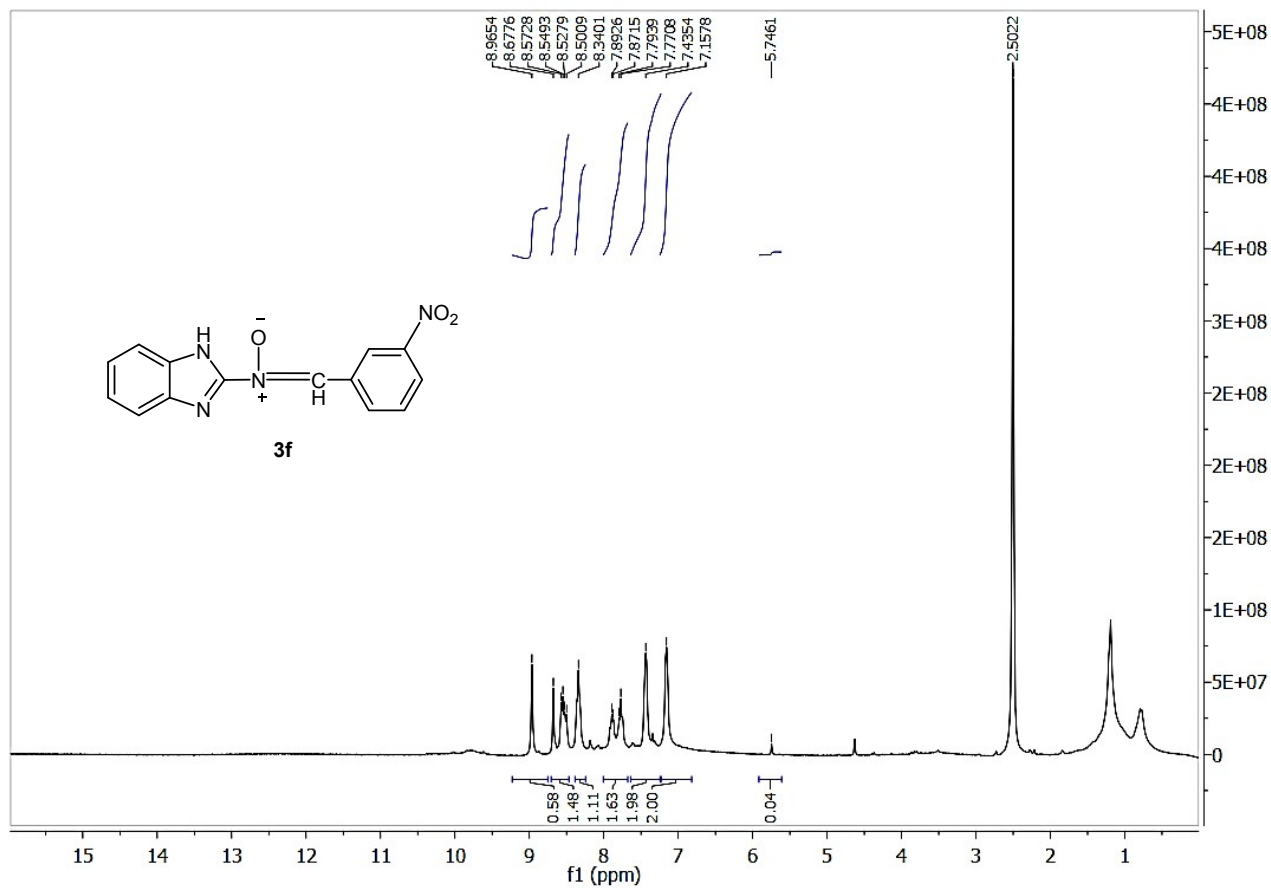

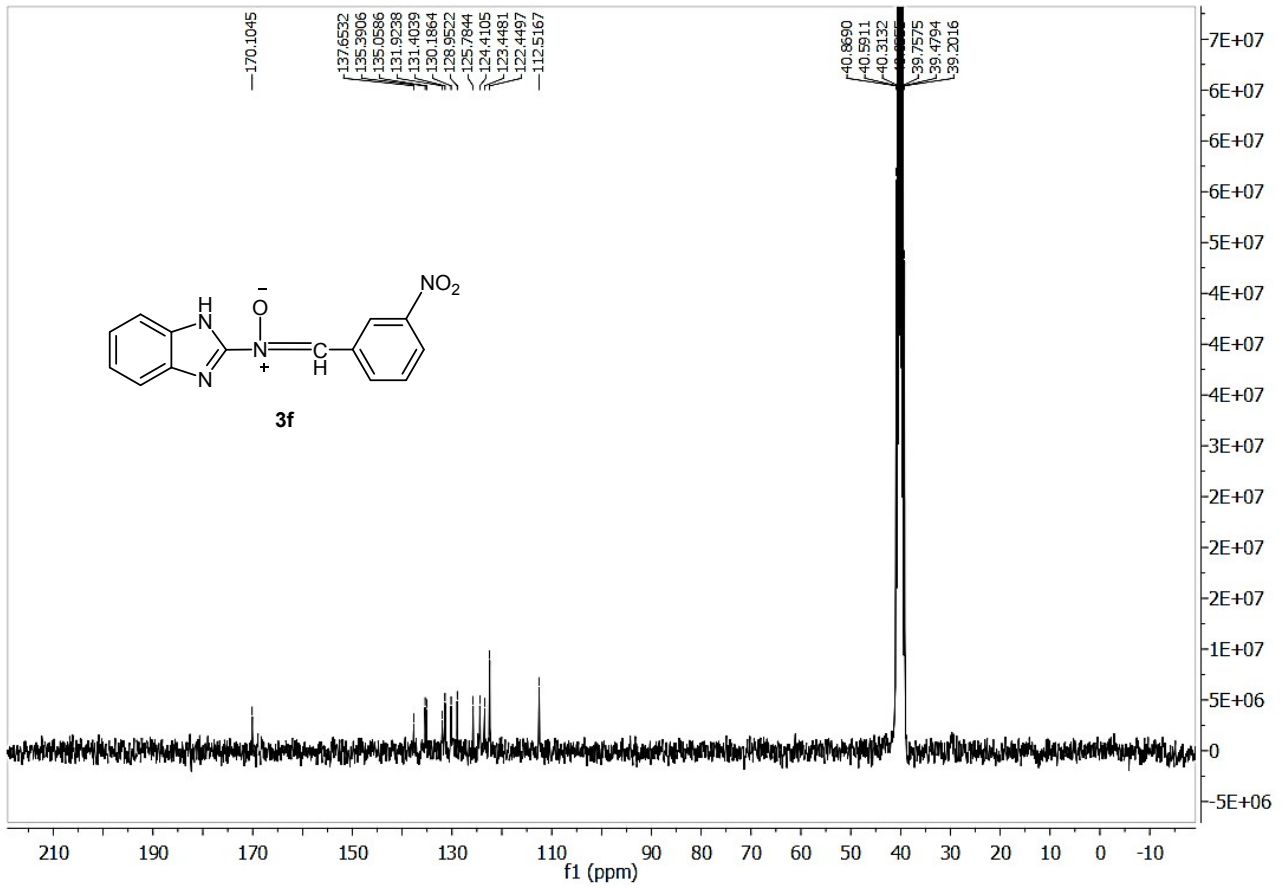

Abundance

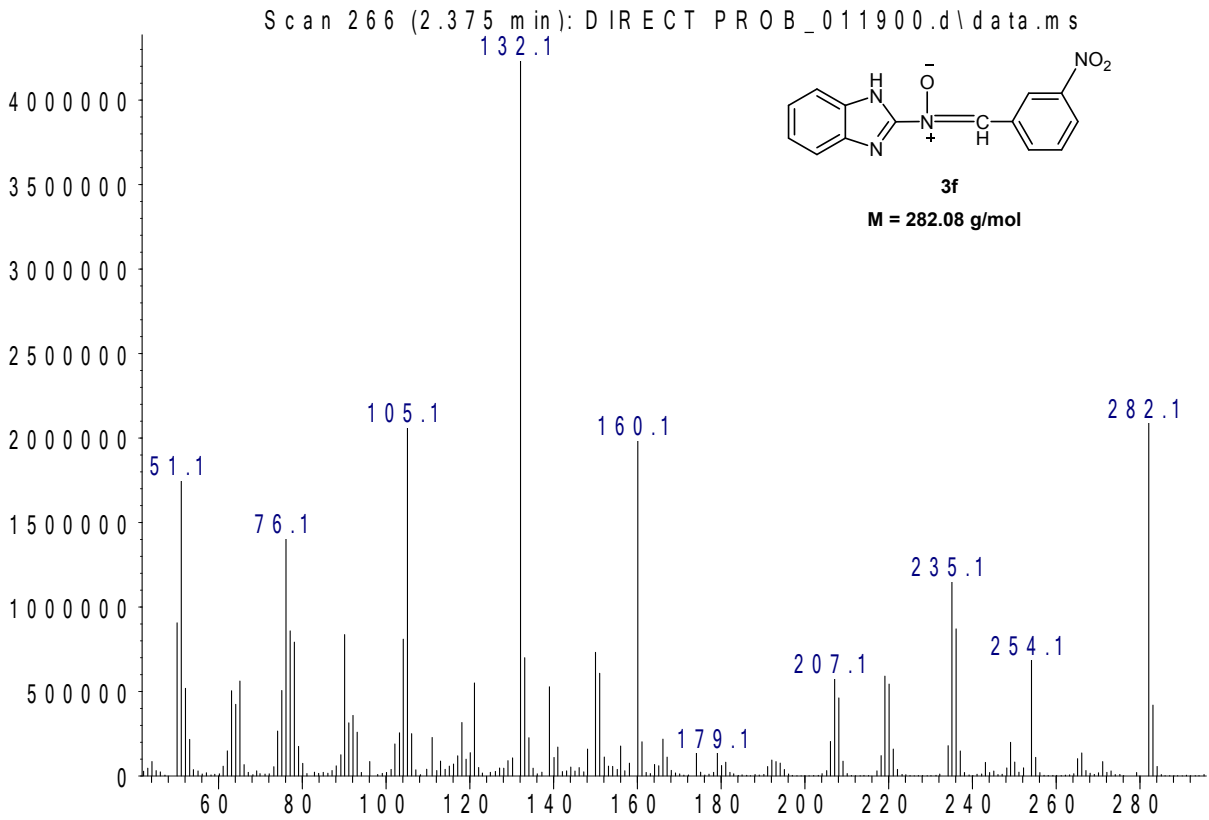

m/z-->

***N*-(1*H*-benzo[*d*]imidazol-2-yl)-*a*-(4-nitrophenyl) nitron (3g)**

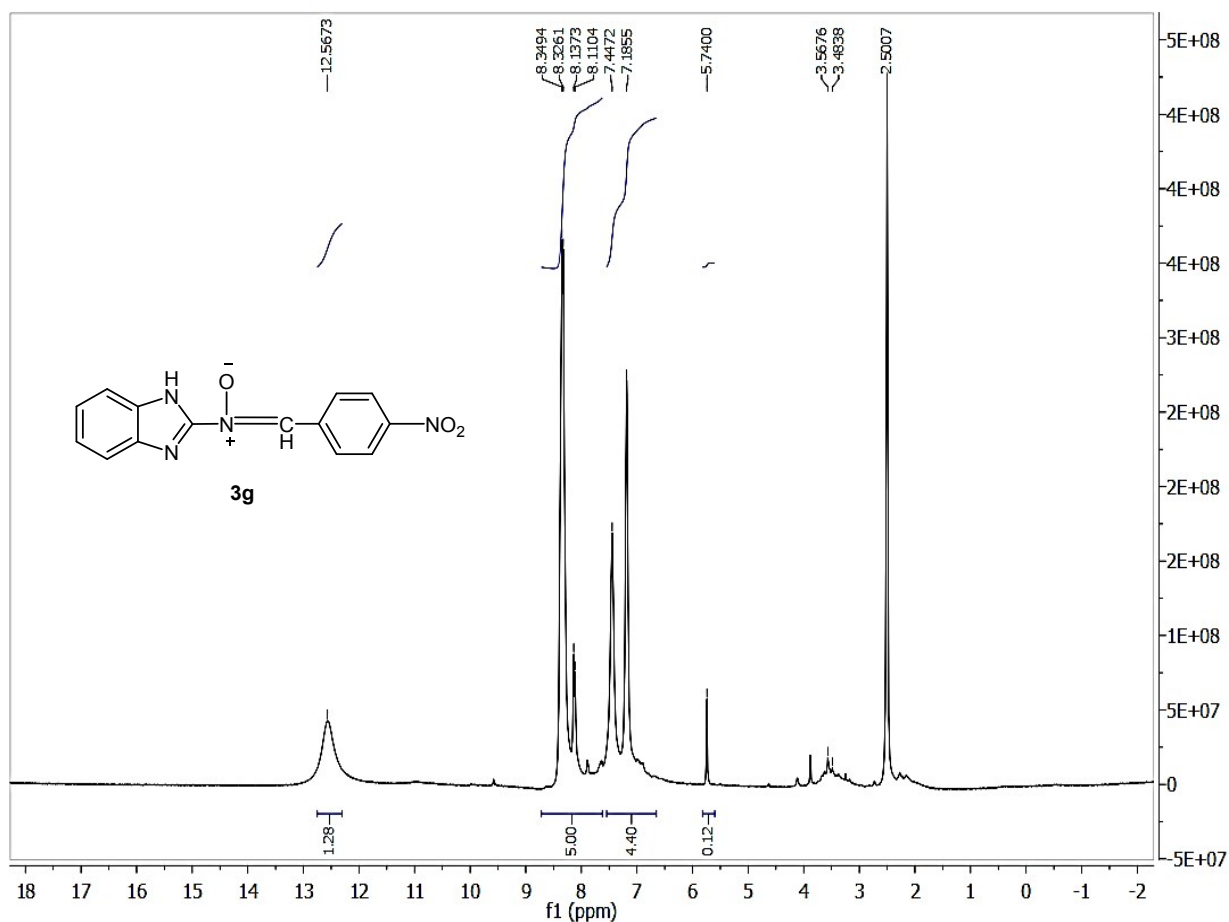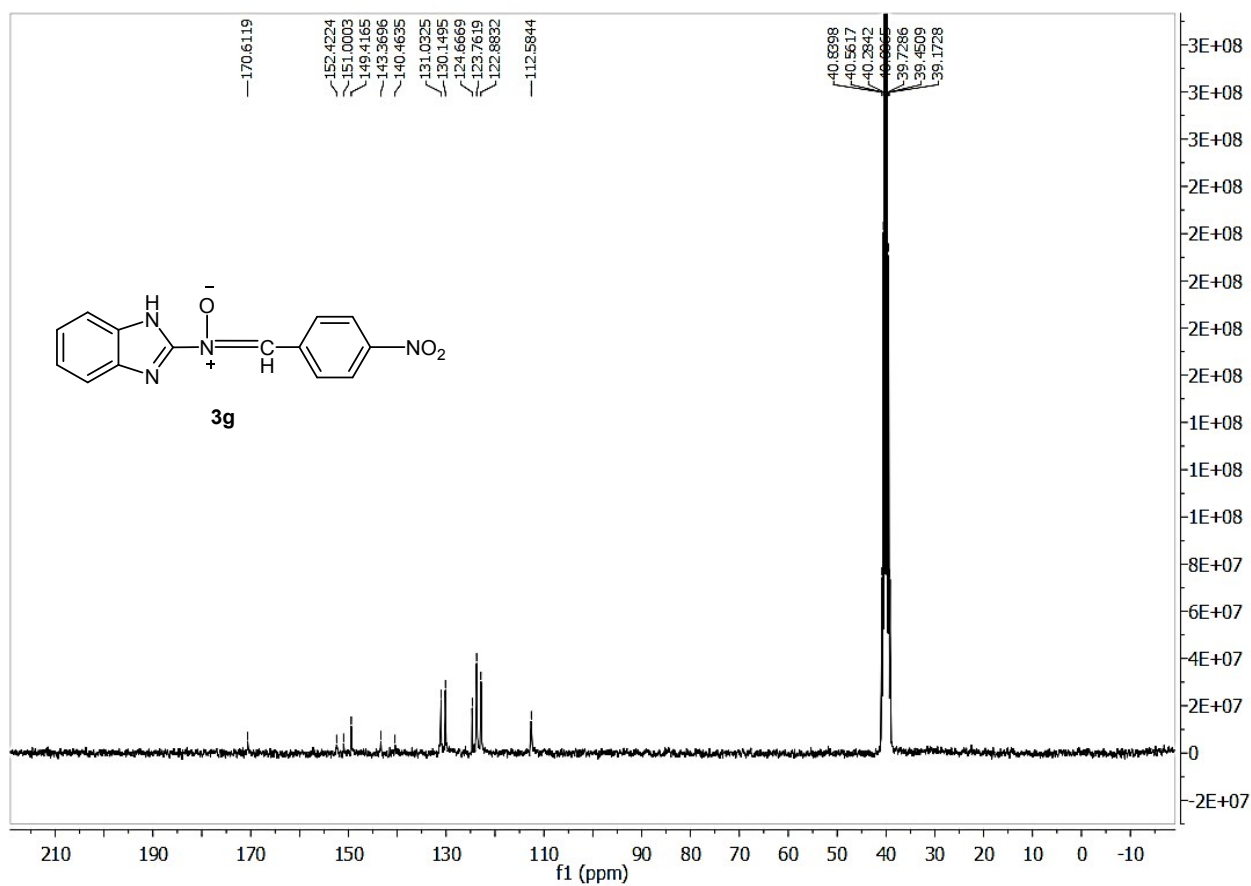

Abundance

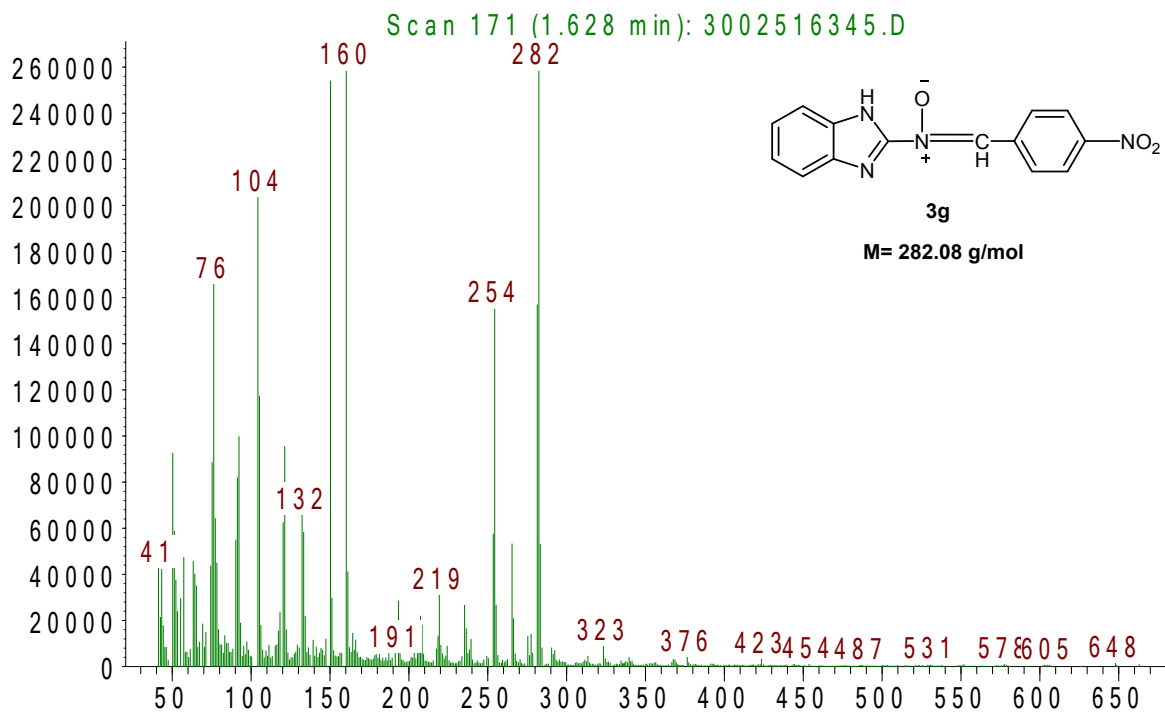

m/z-->

### *N*-(1*H*-benzo[*d*]imidazol-2-yl)-*a*-(*p*-tolyl) nitron (3h)

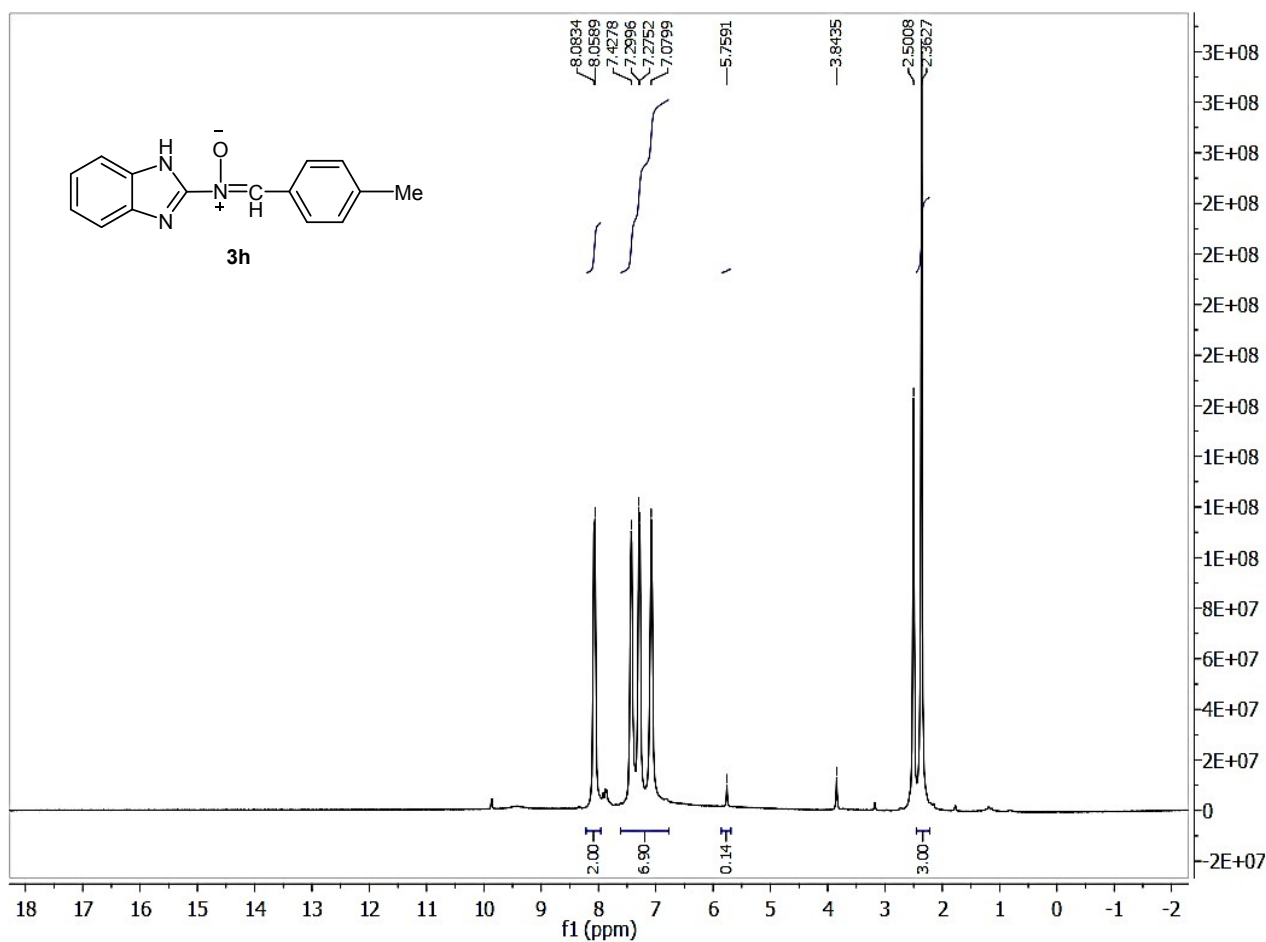



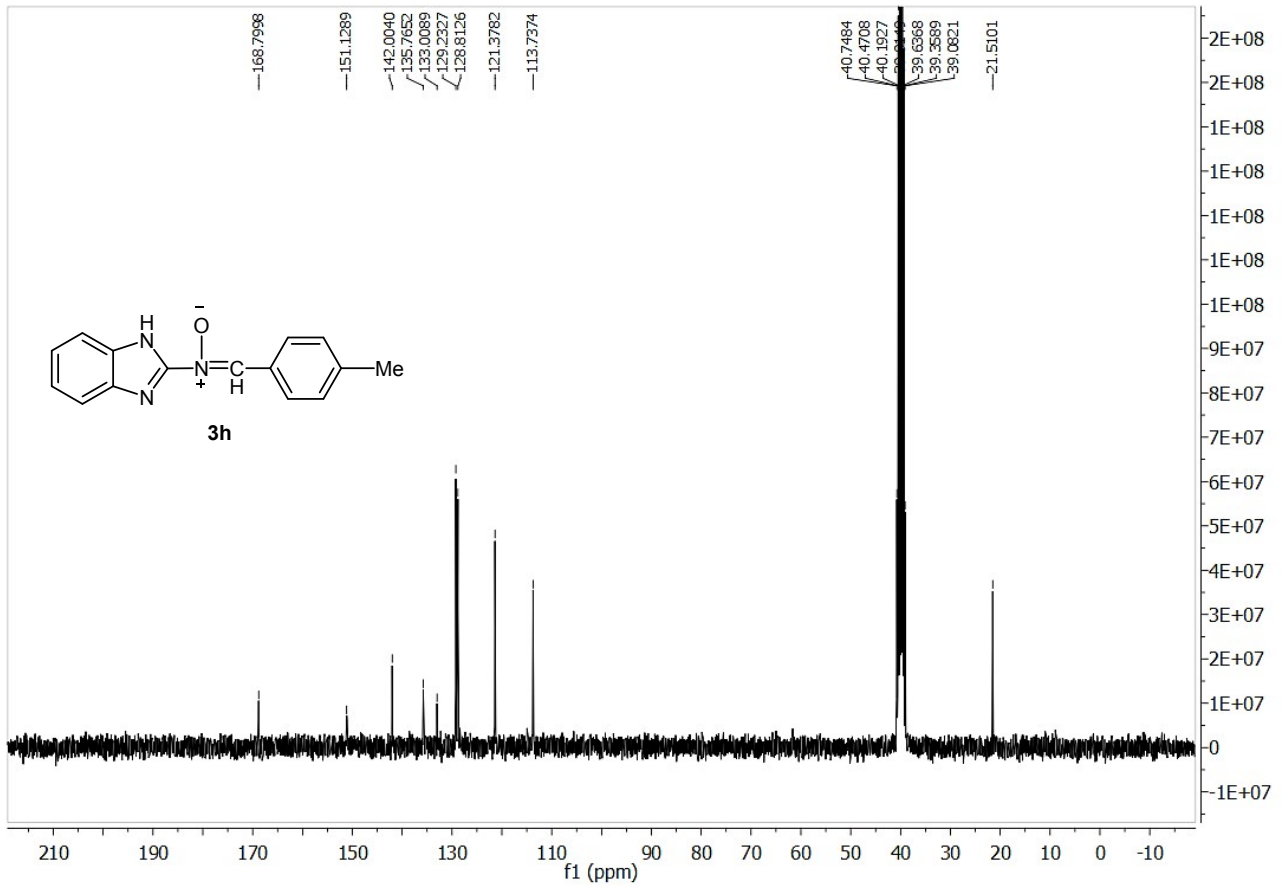

Abundance

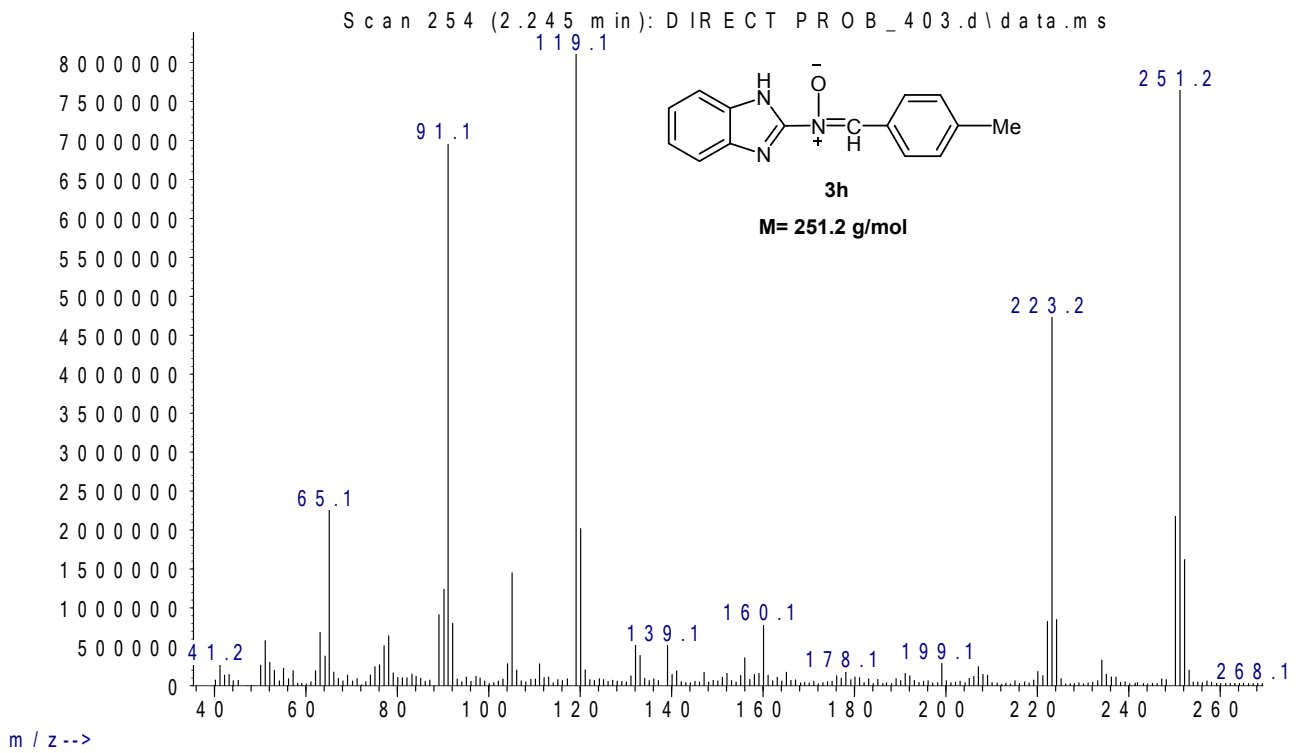

***N*-(1*H*-benzo[*d*]imidazol-2-yl)-*a*-(4-methoxyphenyl) nitron (3i)**

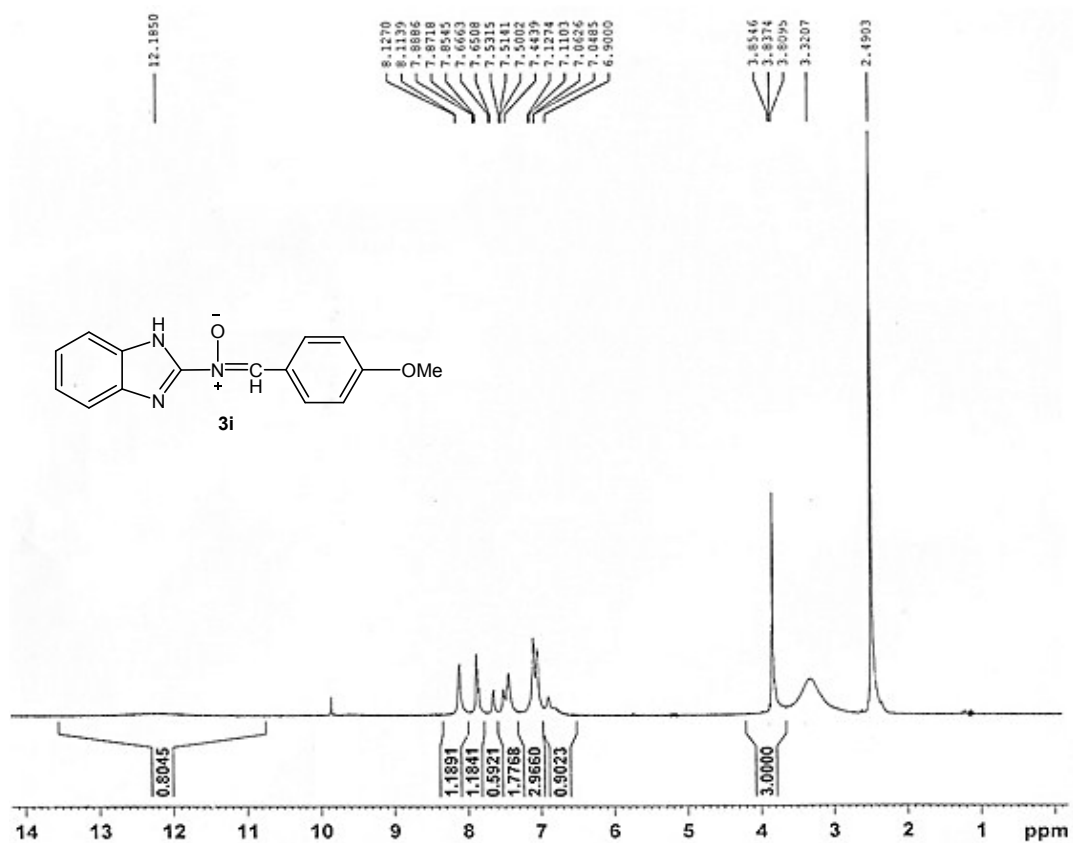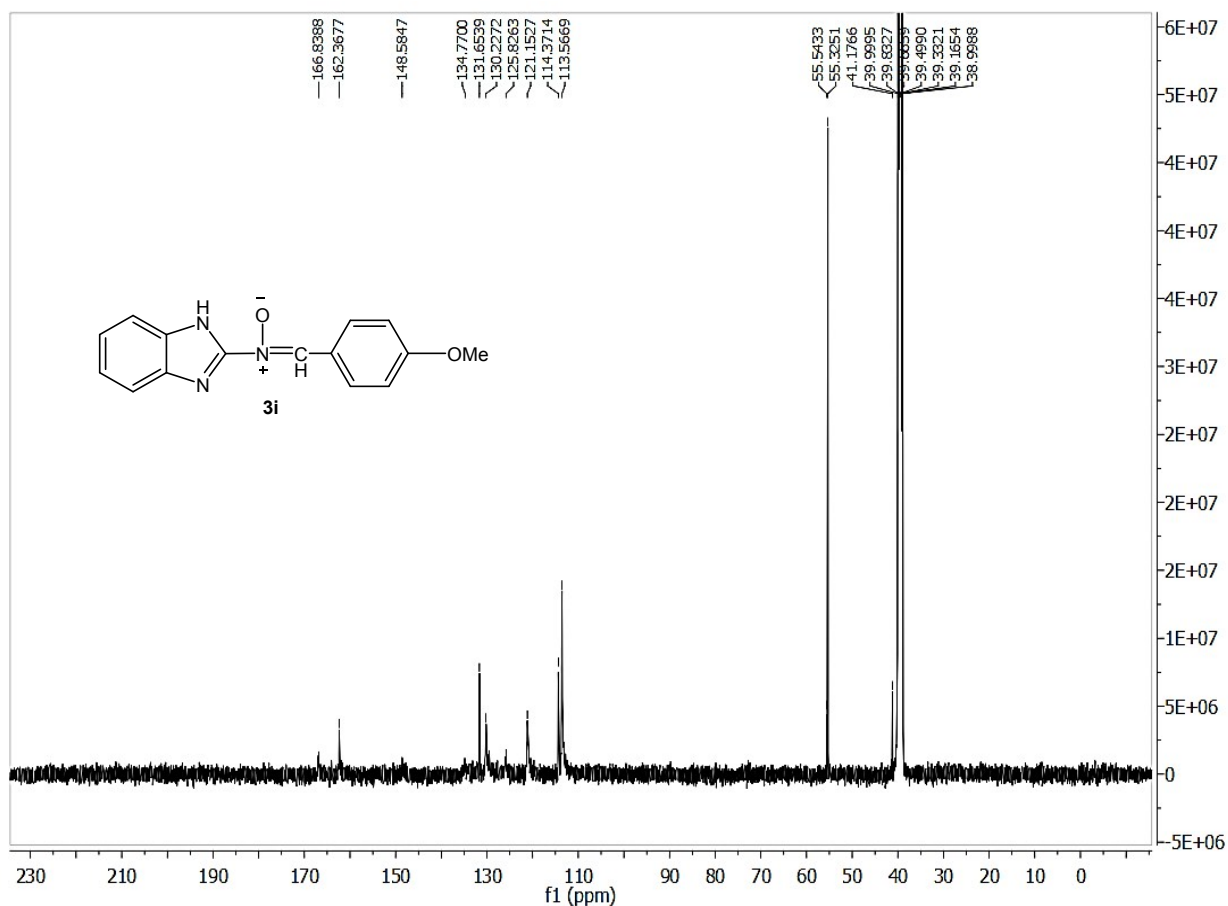

Abundance

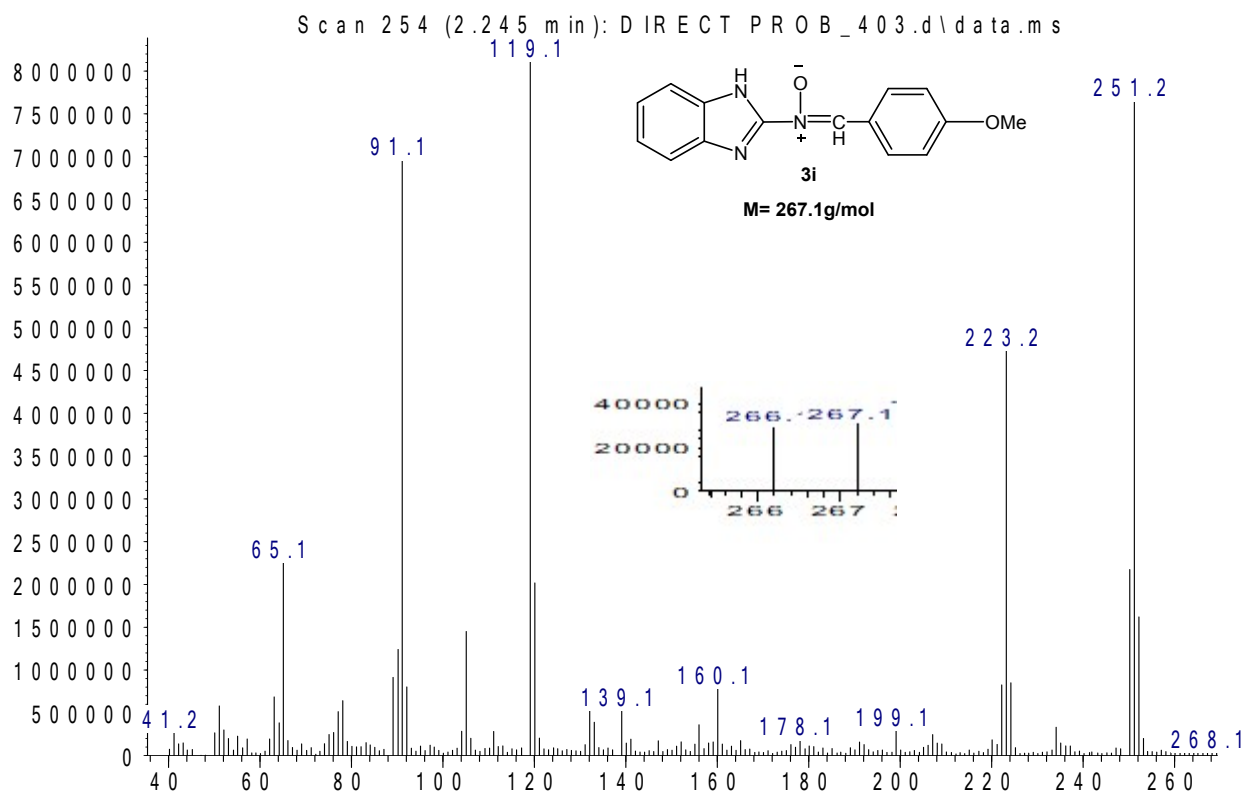

m/z-->

### *N*-(1*H*-benzo[*d*]imidazol-2-yl)-*a*-(2-hydroxyphenyl) nitron (3j)

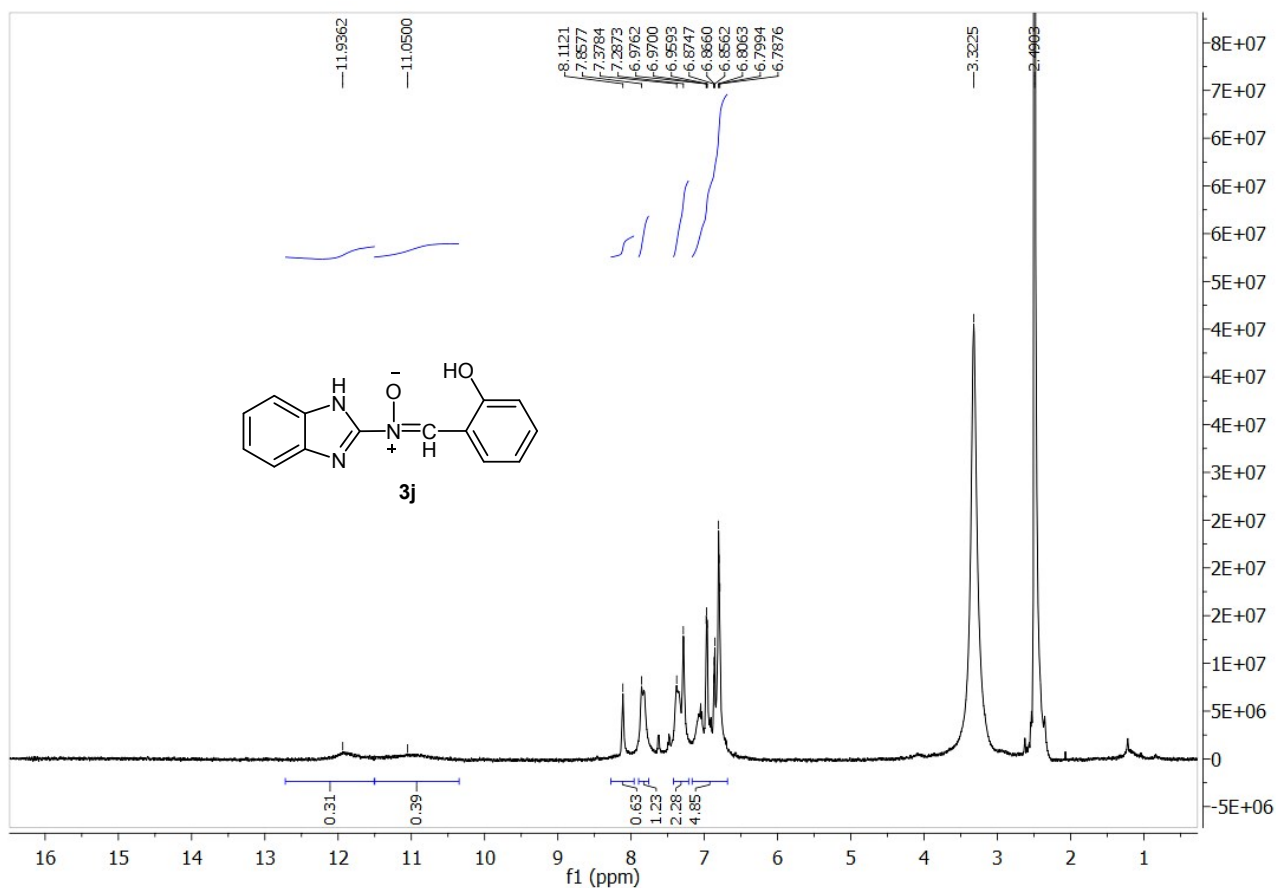

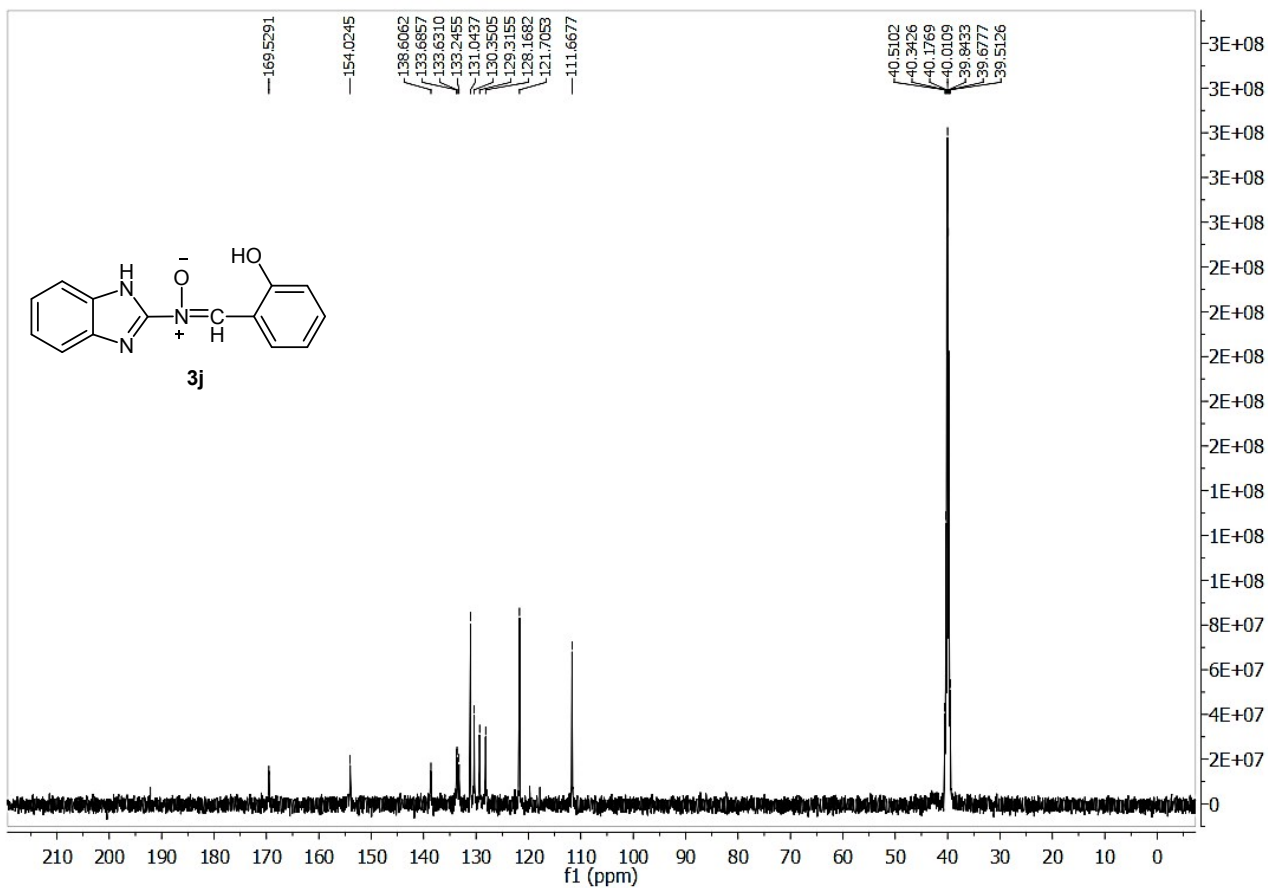

Abundance

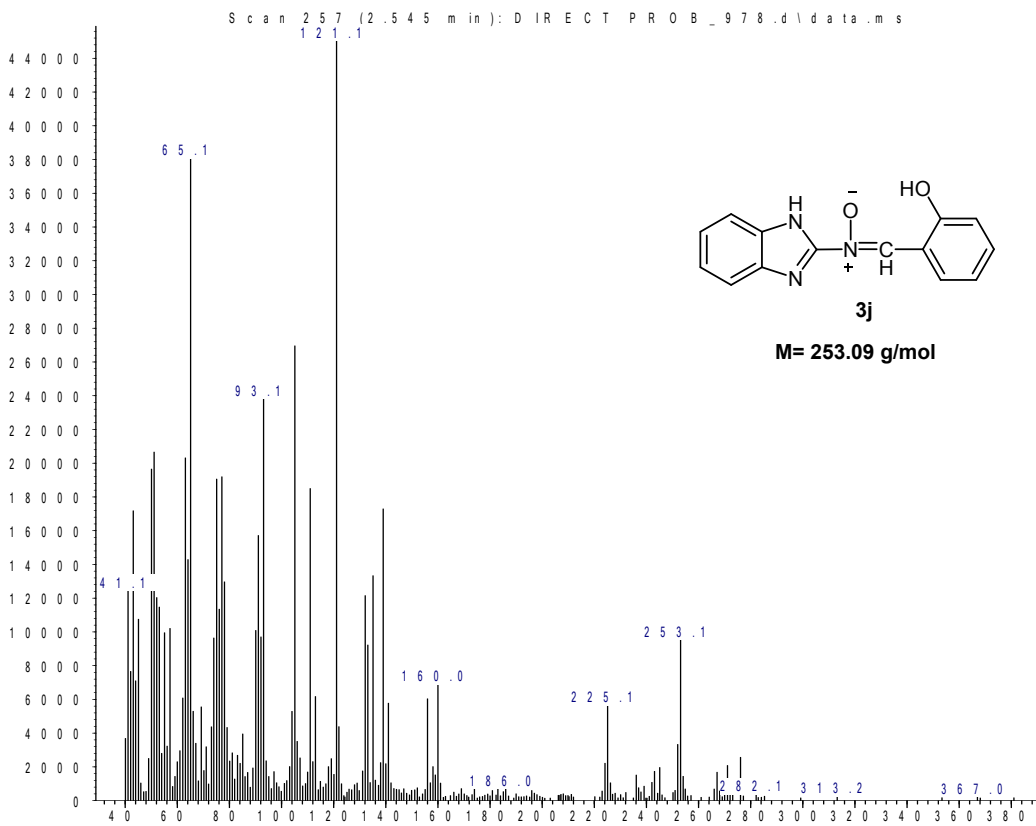

## Computational data of compound 3a

### (*E*)-*N*-(1*H*-benzo[*d*]imidazol-2-yl)-*a*-phenyl nitron (3a<sub>*E*</sub>)

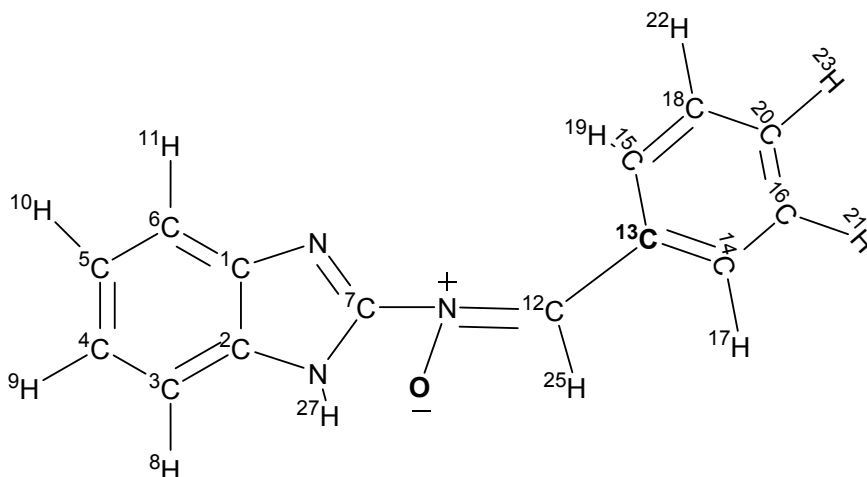

**Table 1.** Principal geometrical parameters including bond lengths (*r*, Å), bond angles and dihedral angles for nitron (**3a<sub>*E*</sub>**) at B3LYP/6-311+G\*.

| variable                         | B3lyp/6-311g(d) | variable      | B3lyp/6-311g(d) | variable          | B3lyp/6-311g(d) |
|----------------------------------|-----------------|---------------|-----------------|-------------------|-----------------|
| Bond length(Å°)                  |                 | Bond angle(°) |                 | dihedral angle(°) |                 |
| C <sub>1</sub> –C <sub>2</sub>   | 1.42            | A(1,2,3)      | 122.32          | D(1,2,3,4)        | -0.00           |
| C <sub>2</sub> –C <sub>3</sub>   | 1.40            | A(2,3,4)      | 116.69          | D(2,3,4,5)        | 0.00            |
| C <sub>3</sub> –C <sub>4</sub>   | 1.39            | A(3,4,5)      | 121.67          | D(3,4,5,6)        | 0.00            |
| C <sub>4</sub> –C <sub>5</sub>   | 1.41            | A(4,5,6)      | 121.48          | D(4,5,6,1)        | 0.00            |
| C <sub>5</sub> –C <sub>6</sub>   | 1.39            | A(1,6,5)      | 117.85          | D(5,6,1,28)       | 179.99          |
| C <sub>1</sub> –N <sub>28</sub>  | 1.39            | A(6,1,28)     | 129.90          | D(6,1,28,7)       | -179.99         |
| C <sub>2</sub> –N <sub>26</sub>  | 1.38            | A(1,28,7)     | 104.40          | D(6,1,2,26)       | 179.99          |
| N <sub>28</sub> –C <sub>7</sub>  | 1.30            | A(3,2,26)     | 133.06          | D(1,2,26,7)       | 0.00            |
| N <sub>26</sub> –H <sub>27</sub> | 1.01            | A(1,2,26)     | 104.61          | D(1,28,7,29)      | -179.99         |
| N <sub>26</sub> –C <sub>7</sub>  | 1.36            | A(2,26,7)     | 106.65          | D(1,28,7,26)      | 0.00            |
| C <sub>7</sub> –N <sub>29</sub>  | 1.43            | A(2,26,27)    | 132.06          | D(27,26,7,28)     | -179.99         |
| N <sub>29</sub> –O <sub>24</sub> | 1.30            | A(27,26,7)    | 121.29          | D(27,26,7,29)     | 0.00            |
| N <sub>29</sub> –C <sub>12</sub> | 1.33            | A(26,7,29)    | 115.45          | D(28,7,29,24)     | -179.98         |
| C <sub>12</sub> –H <sub>25</sub> | 1.08            | A(28,7,29)    | 130.33          | D(26,7,29,24)     | 0.01            |
| C <sub>12</sub> –C <sub>13</sub> | 1.45            | A(7,29,24)    | 111.95          | D(7,29,12,13)     | 0.02            |
| C <sub>13</sub> –C <sub>15</sub> | 1.41            | A(24,29,12)   | 119.21          | D(24,29,12,13)    | -179.98         |
| C <sub>13</sub> –C <sub>14</sub> | 1.42            | A(29,12,25)   | 107.25          | D(29,12,13,15)    | -0.04           |
| C <sub>14</sub> –C <sub>16</sub> | 1.39            | A(29,12,13)   | 137.99          | D(29,12,13,14)    | 179.97          |
| C <sub>15</sub> –C <sub>18</sub> | 1.39            | A(13,15,18)   | 120.36          | D(12,13,14,16)    | 179.99          |
| C <sub>18</sub> –C <sub>20</sub> | 1.39            | A(15,13,14)   | 117.52          | D(25,12,13,15)    | 179.97          |
| C <sub>16</sub> –C <sub>20</sub> | 1.39            | A(12,13,14)   | 113.26          | D(12,13,14,17)    | -0.00           |
| C <sub>15</sub> –H <sub>19</sub> | 1.08            | A(13,14,16)   | 121.63          | D(13,14,16,20)    | -0.00           |
| C <sub>14</sub> –H <sub>17</sub> | 1.09            | A(14,16,20)   | 119.96          | D(21,16,20,18)    | 179.99          |
| C <sub>3</sub> –H <sub>8</sub>   | 1.08            | A(16,20,18)   | 119.28          | D(13,15,18,20)    | 0.00            |
| C <sub>6</sub> –H <sub>11</sub>  | 1.08            | A(20,18,15)   | 121.25          |                   |                 |

**Figure 1.** The Computational  $^1\text{H}$ -NMR Spectrum Data for nitron (3a<sub>E</sub>) at B3LYP/6-311+G\*.

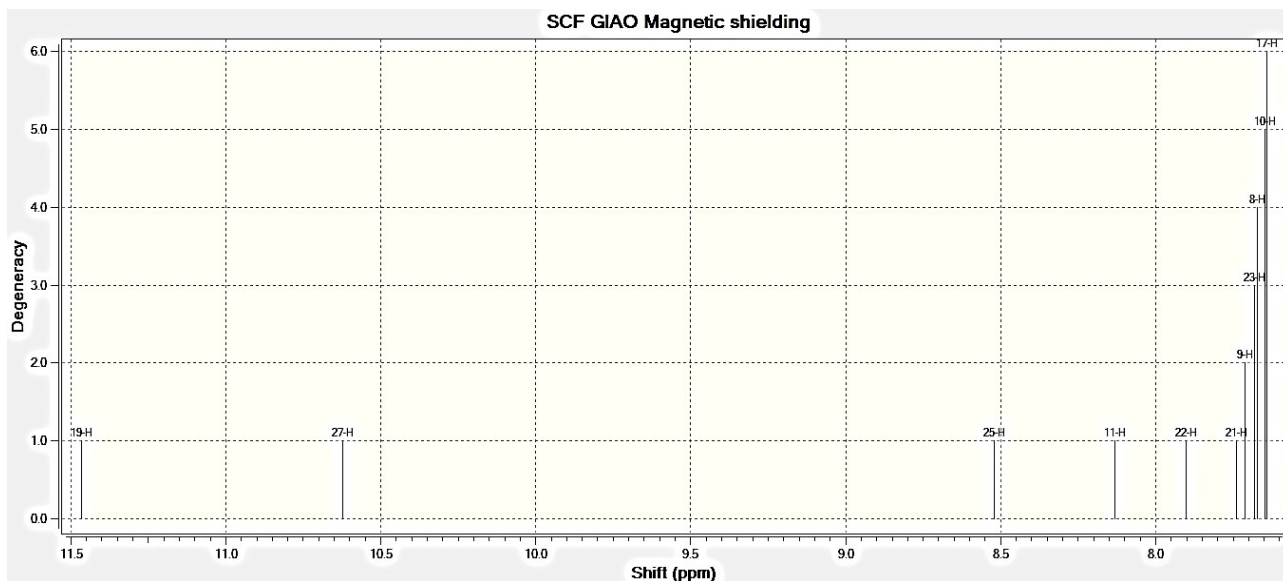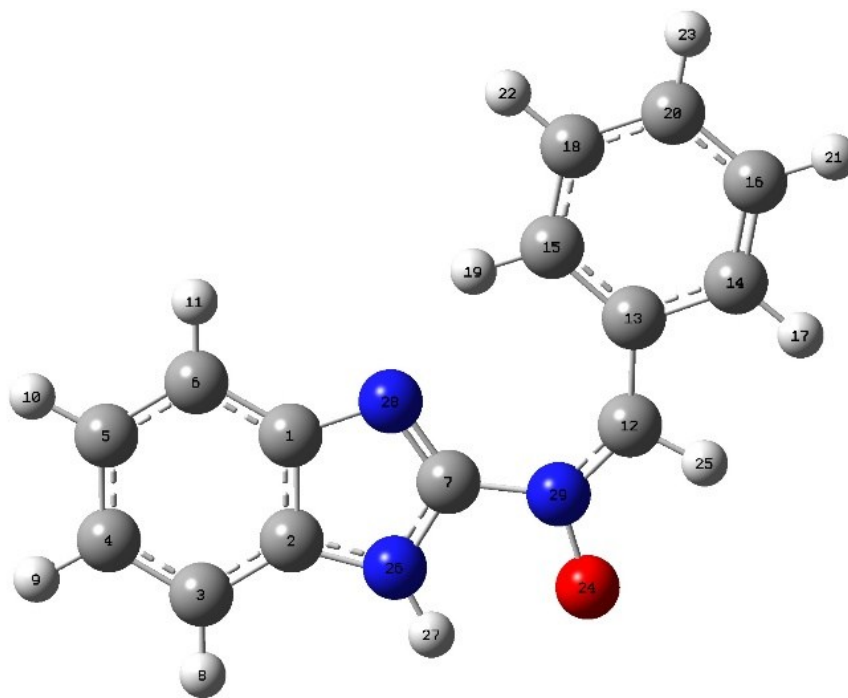

|       |                     |                     |      |      |      |      |      |      |      |      |
|-------|---------------------|---------------------|------|------|------|------|------|------|------|------|
| 19-H  | <b>27-H<br/>N-H</b> | <b>25-H<br/>C-H</b> | 11-H | 22-H | 21-H | 9-H  | 23-H | 8-H  | 10-H | 17-H |
| 11.64 | <b>10.62</b>        | <b>8.52</b>         | 8.13 | 7.90 | 7.74 | 7.71 | 7.68 | 7.67 | 7.64 | 7.64 |

**(Z)-N-(1H-benzo[d]imidazol-2-yl)-a-phenyl nitron (3a<sub>Z</sub>)**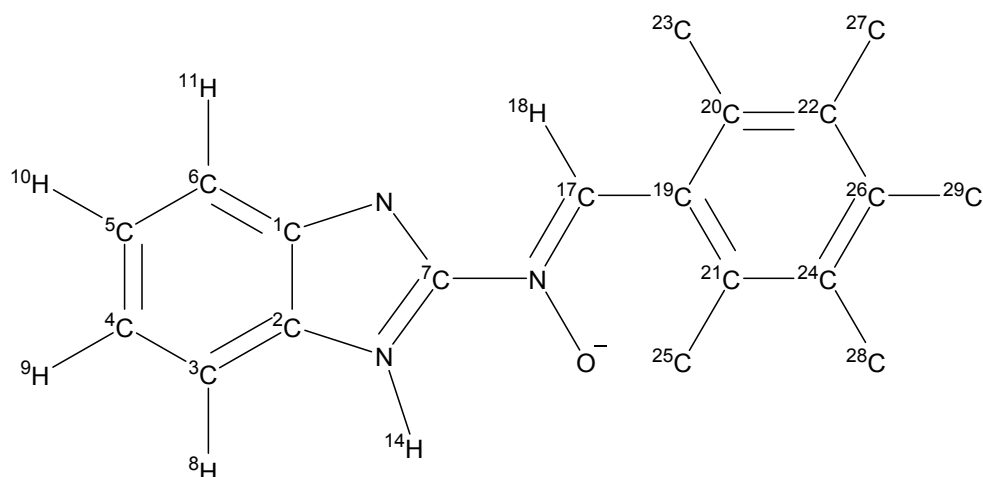**Table 2.** Principal geometrical parameters including bond lengths (r, Å), bond angles and dihedral angles for nitron (**3a<sub>Z</sub>**) at B3LYP/6-311+G\*.

| variable                         | B3lyp/6-311g(d) | variable       | B3lyp/6-311g(d) | variable           | B3lyp/6-311g(d) |
|----------------------------------|-----------------|----------------|-----------------|--------------------|-----------------|
| Bond length(A°)                  |                 | ∠Bond angle(°) |                 | ∠dihedral angle(°) |                 |
| C <sub>1</sub> –C <sub>2</sub>   | 1.42            | A(1,2,3)       | 122.41          | D(1,2,3,4)         | 0.00            |
| C <sub>2</sub> –C <sub>3</sub>   | 1.39            | A(2,3,4)       | 116.71          | D(2,3,4,5)         | 0.00            |
| C <sub>3</sub> –C <sub>4</sub>   | 1.39            | A(3,4,5)       | 121.61          | D(3,4,5,6)         | 0.00            |
| C <sub>4</sub> –C <sub>5</sub>   | 1.41            | A(4,5,6)       | 121.49          | D(4,5,6,1)         | 0.00            |
| C <sub>5</sub> –C <sub>6</sub>   | 1.39            | A(1,6,5)       | 117.96          | D(5,6,1,12)        | 180.00          |
| C <sub>1</sub> –N <sub>12</sub>  | 1.39            | A(6,1,12)      | 129.88          | D(6,1,12,7)        | 180.00          |
| C <sub>2</sub> –N <sub>13</sub>  | 1.38            | A(1,12,7)      | 103.81          | D(6,1,2,13)        | 180.00          |
| N <sub>12</sub> –C <sub>7</sub>  | 1.30            | A(3,2,13)      | 133.01          | D(1,2,13,7)        | 0.00            |
| N <sub>13</sub> –H <sub>14</sub> | 1.01            | A(1,2,13)      | 104.57          | D(1,12,7,15)       | -180.00         |
| N <sub>13</sub> –C <sub>7</sub>  | 1.36            | A(2,13,7)      | 106.09          | D(1,12,7,13)       | 0.00            |
| C <sub>7</sub> –N <sub>15</sub>  | 1.43            | A(2,13,14)     | 131.32          | D(14,13,7,12)      | 179.99          |
| N <sub>15</sub> –O <sub>16</sub> | 1.29            | A(14,13,7)     | 122.58          | D(14,13,7,15)      | 0.00            |
| N <sub>15</sub> –C <sub>17</sub> | 1.32            | A(13,7,15)     | 117.44          | D(12,7,15,16)      | -179.99         |
| C <sub>17</sub> –H <sub>18</sub> | 1.08            | A(12,7,15)     | 127.35          | D(13,7,15,16)      | 0.01            |
| C <sub>17</sub> –C <sub>19</sub> | 1.44            | A(7,15,16)     | 114.64          | D(7,15,17,19)      | -179.99         |
| C <sub>19</sub> –C <sub>20</sub> | 1.41            | A(16,15,17)    | 127.10          | D(16,15,17,19)     | -0.00           |
| C <sub>19</sub> –C <sub>21</sub> | 1.41            | A(15,17,18)    | 113.54          | D(15,17,19,20)     | 180.00          |
| C <sub>20</sub> –C <sub>22</sub> | 1.39            | A(15,17,19)    | 126.49          | D(15,17,19,21)     | 0.00            |
| C <sub>22</sub> –C <sub>26</sub> | 1.40            | A(19,20,22)    | 120.96          | D(17,19,21,24)     | -180.00         |
| C <sub>26</sub> –C <sub>24</sub> | 1.39            | A(20,19,21)    | 118.54          | D(18,17,19,20)     | 0.00            |
| C <sub>24</sub> –C <sub>21</sub> | 1.39            | A(21,19,17)    | 124.65          | D(17,19,21,25)     | 0.00            |
| C <sub>21</sub> –H <sub>25</sub> | 1.08            | A(19,21,24)    | 119.93          | D(19,21,24,26)     | 0.00            |
| C <sub>20</sub> –H <sub>23</sub> | 1.09            | A(20,22,26)    | 119.96          | D(21,24,26,22)     | 0.00            |
| C <sub>3</sub> –H <sub>8</sub>   | 1.08            | A(22,26,24)    | 119.74          | D(19,20,22,26)     | 0.00            |
| C <sub>6</sub> –H <sub>11</sub>  | 1.08            | A(26,24,21)    | 120.87          |                    |                 |

Figure 2. The Computational  $^1\text{H}$ -NMR Spectrum Data for nitrone ( $3a_z$ ) at B3LYP/6-311+G\*.

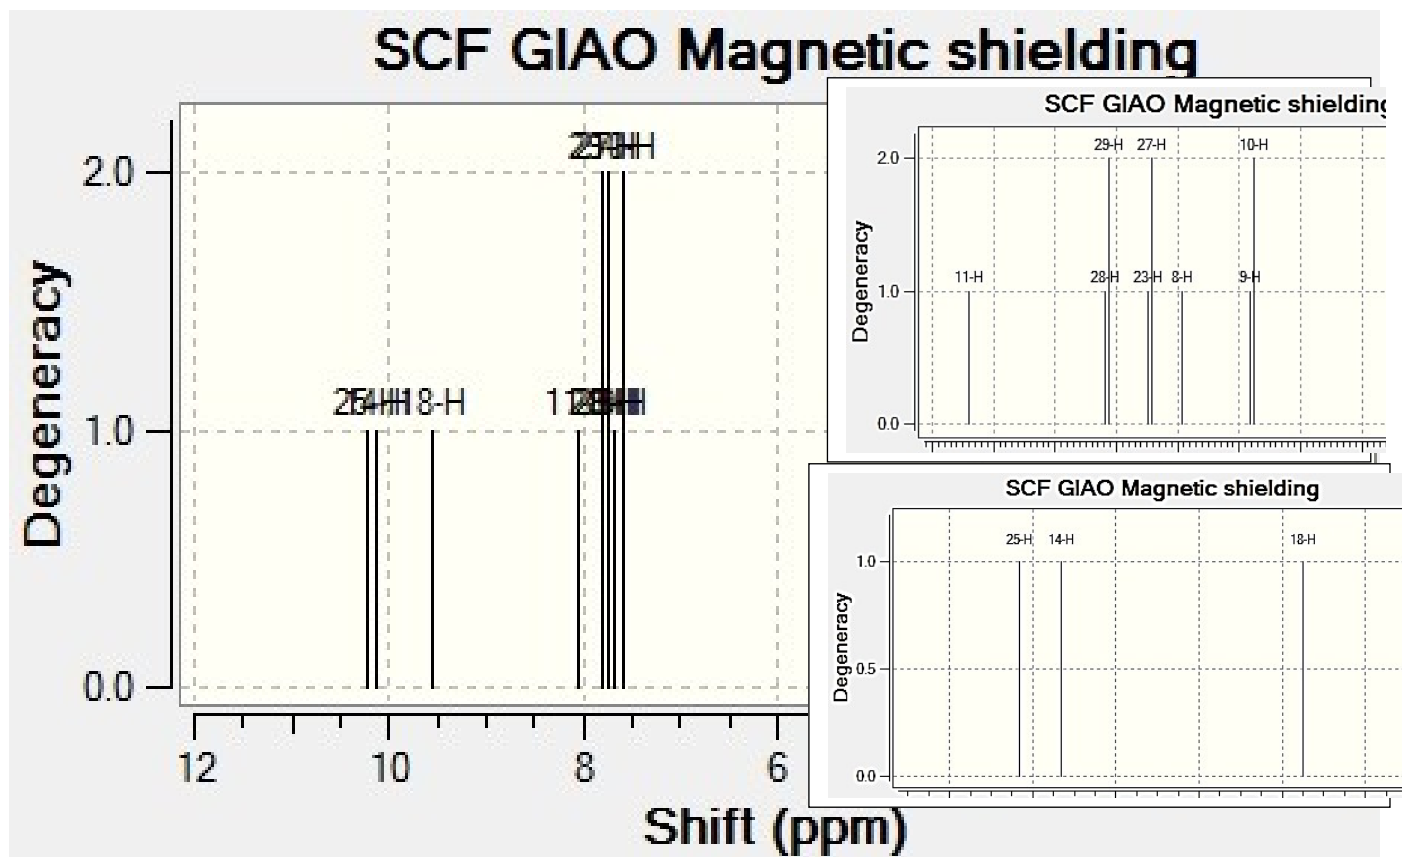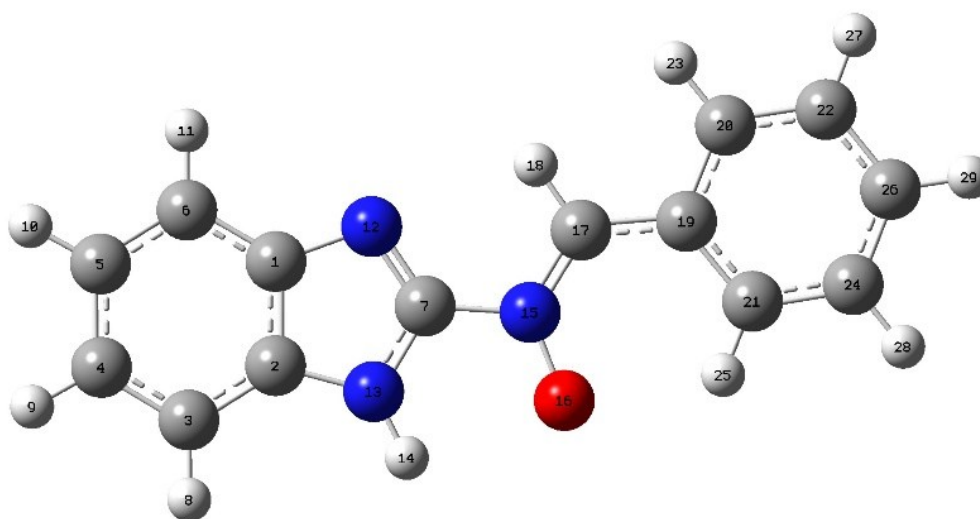



|       |                           |                           |      |      |      |      |      |      |      |      |
|-------|---------------------------|---------------------------|------|------|------|------|------|------|------|------|
| 25-H  | <b>14-H</b><br><b>N-H</b> | <b>18-H</b><br><b>C-H</b> | 11-H | 28-H | 29-H | 23-H | 27-H | 8-H  | 9-H  | 10-H |
| 10.23 | <b>10.13</b>              | <b>9.55</b>               | 8.04 | 7.81 | 7.81 | 7.74 | 7.74 | 7.69 | 7.58 | 7.57 |

**2-(1*H*-benzo[d]imidazol-2-yl)-3-phenyl-1,2-oxaziridine (4)**

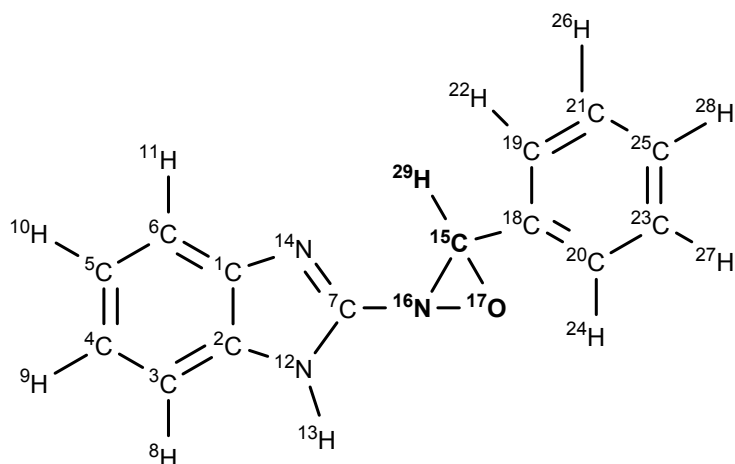

**Table 3.** Principal geometrical parameters including bond lengths ( $r$ , Å), bond angles and dihedral angles for the oxaziridine (**4**) at B3LYP/6-311+G\*.

| variable                         | B3lyp/6-311g(d) | variable       | B3lyp/6-311g(d) | variable           | B3lyp/6-311g(d) |
|----------------------------------|-----------------|----------------|-----------------|--------------------|-----------------|
| Bond length (Å°)                 |                 | Bond angle (°) |                 | dihedral angle (°) |                 |
| C <sub>1</sub> –C <sub>2</sub>   | 1.42            | A(1,2,3)       | 122.41          | D(1,2,3,4)         | 0.05            |
| C <sub>2</sub> –C <sub>3</sub>   | 1.39            | A(2,3,4)       | 116.73          | D(2,3,4,5)         | -0.02           |
| C <sub>3</sub> –C <sub>4</sub>   | 1.39            | A(3,4,5)       | 121.61          | D(3,4,5,6)         | 0.05            |
| C <sub>4</sub> –C <sub>5</sub>   | 1.41            | A(4,5,6)       | 121.41          | D(4,5,6,1)         | -0.11           |
| C <sub>5</sub> –C <sub>6</sub>   | 1.39            | A(1,6,5)       | 118.06          | D(5,6,1,14)        | -179.96         |
| C <sub>1</sub> –N <sub>14</sub>  | 1.38            | A(6,1,14)      | 129.88          | D(6,1,14,7)        | -179.83         |
| C <sub>2</sub> –N <sub>12</sub>  | 1.38            | A(1,14,7)      | 104.74          | D(6,1,2,12)        | 179.66          |
| N <sub>14</sub> –C <sub>7</sub>  | 1.31            | A(3,2,12)      | 133.15          | D(1,2,12,7)        | 0.33            |
| N <sub>12</sub> –H <sub>13</sub> | 1.01            | A(1,2,12)      | 104.43          | D(1,14,7,16)       | 176.95          |
| N <sub>12</sub> –C <sub>7</sub>  | 1.37            | A(2,12,7)      | 106.86          | D(1,14,7,12)       | 0.15            |
| C <sub>7</sub> –N <sub>16</sub>  | 1.41            | A(2,12,13)     | 128.27          | D(13,12,7,14)      | 179.11          |
| N <sub>16</sub> –O <sub>17</sub> | 1.53            | A(13,12,7)     | 124.87          | D(13,12,7,16)      | 1.94            |
| N <sub>16</sub> –C <sub>15</sub> | 1.44            | A(12,7,16)     | 117.86          | D(14,7,16,17)      | 78.10           |
| C <sub>15</sub> –H <sub>29</sub> | 1.09            | A(14,7,16)     | 128.46          | D(12,7,16,17)      | -105.21         |
| C <sub>15</sub> –C <sub>18</sub> | 1.49            | A(7,16,17)     | 110.14          | D(7,16,15,18)      | -150.56         |
| C <sub>18</sub> –C <sub>19</sub> | 1.39            | A(17,16,15)    | 56.65           | D(17,16,15,18)     | 110.56          |
| C <sub>18</sub> –C <sub>20</sub> | 1.40            | A(16,15,29)    | 115.43          | D(16,15,18,19)     | 134.63          |
| C <sub>20</sub> –C <sub>23</sub> | 1.40            | A(16,15,18)    | 118.25          | D(17,15,18,20)     | 29.37           |
| C <sub>19</sub> –C <sub>21</sub> | 1.39            | A(18,19,21)    | 120.31          | D(15,18,20,23)     | 179.84          |
| C <sub>21</sub> –C <sub>25</sub> | 1.39            | A(19,18,20)    | 119.64          | D(29,15,18,19)     | -8.86           |
| C <sub>23</sub> –C <sub>25</sub> | 1.39            | A(15,18,20)    | 120.85          | D(15,18,20,24)     | -0.44           |
| C <sub>19</sub> –H <sub>22</sub> | 1.09            | A(18,20,23)    | 120.01          | D(18,20,23,25)     | 0.11            |

|                                  |      |             |        |                |         |
|----------------------------------|------|-------------|--------|----------------|---------|
| C <sub>20</sub> -H <sub>24</sub> | 1.08 | A(20,23,25) | 120.21 | D(27,23,25,21) | -179.69 |
| C <sub>3</sub> -H <sub>8</sub>   | 1.08 | A(23,25,21) | 119.95 | D(18,19,21,25) | -0.38   |
| C <sub>6</sub> -H <sub>11</sub>  | 1.08 | A(19,21,25) | 119.87 |                |         |

**Figure 3.** The Computational <sup>1</sup>H-NMR Spectrum Data for oxaziridine (4) at B3LYP/6-311+G\*

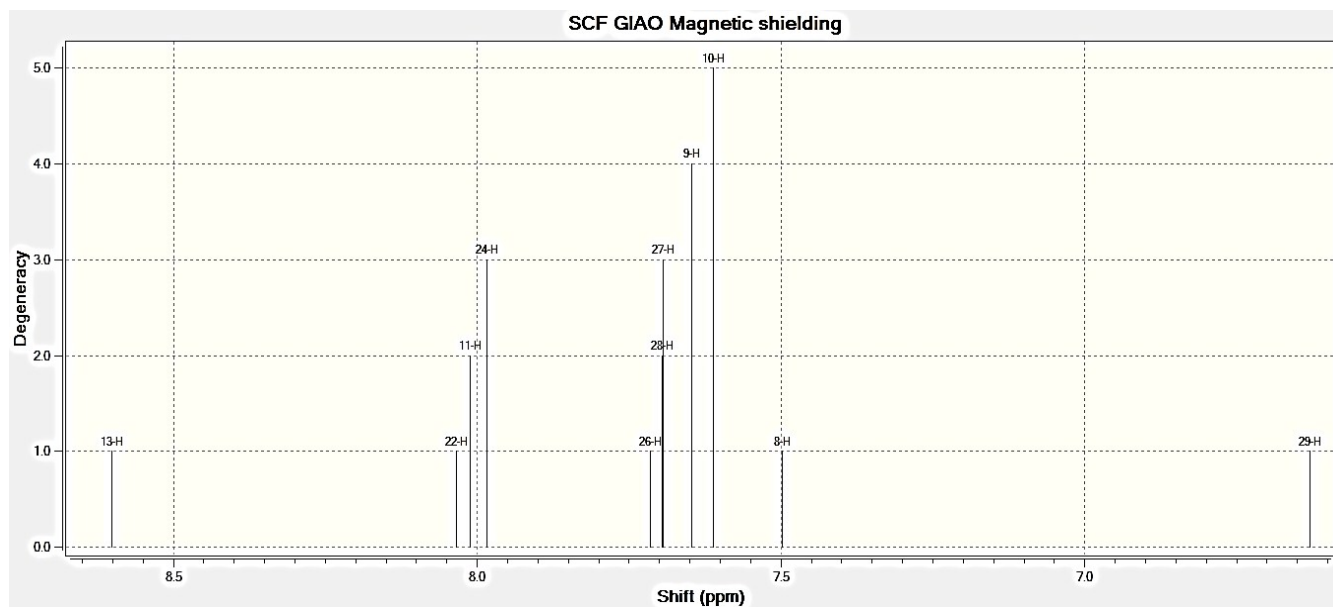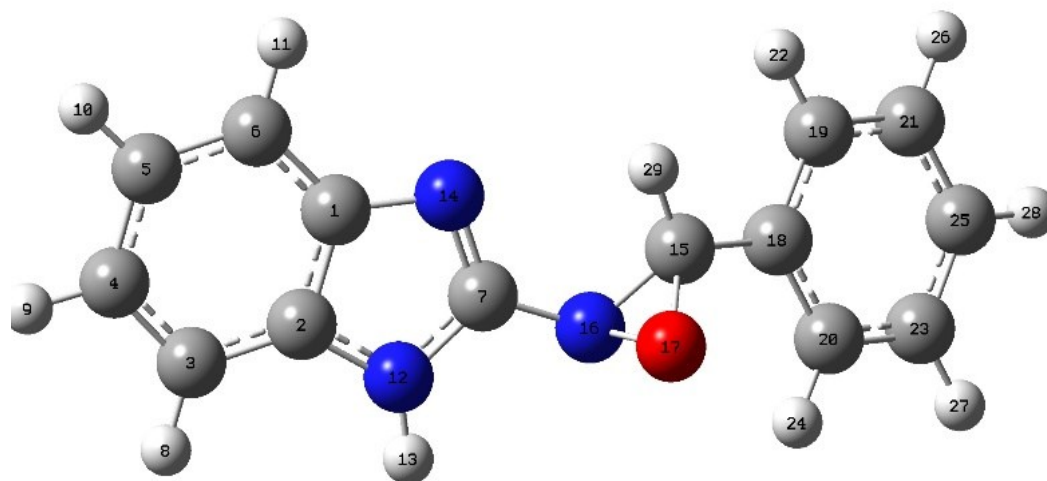

|             |      |      |      |      |      |      |      |     |      |     |             |
|-------------|------|------|------|------|------|------|------|-----|------|-----|-------------|
| <b>13-H</b> | 22-H | 11-H | 24-H | 22-H | 26-H | 28-H | 27-H | 9-H | 10-H | 8-H | <b>29-H</b> |
| <b>N-H</b>  |      |      |      |      |      |      |      |     |      |     | <b>C-H</b>  |

|             |      |      |      |      |      |      |      |      |      |      |             |
|-------------|------|------|------|------|------|------|------|------|------|------|-------------|
| <b>8.60</b> | 8.03 | 8.01 | 7.98 | 7.90 | 7.71 | 7.69 | 7.69 | 7.64 | 7.61 | 7.64 | <b>6.62</b> |
|-------------|------|------|------|------|------|------|------|------|------|------|-------------|
